# Supplementary material
Source: publisher site journal article supplement (https://www.spandidos-publications.com/7832/downloadSupplementary)
Supplement: Supplementary file 1 [file downloadSupplementary]

## Sheet: Sheet1
Table SIII. Mendelian randomization analysis of 22 gene-outcome causal relationships in the validation set of pQTL.
SNP	chr	pos	effect_allele	other_allele	beta	se	pval	Symbol
rs77923270	1	37318335	T	G	-0.13485	0.0274506	8.99353e-07	ABCA2
rs332152	10	28585602	A	G	-0.0510611	0.00959151	1.01751e-07	ABCA2
rs144932926	11	1764171	C	T	-0.0727013	0.0135226	7.60361e-08	ABCA2
rs12980358	19	8661298	A	G	-0.10975	0.0223566	9.1504e-07	ABCA2
rs11736618	4	53955400	C	T	0.0376711	0.00766536	8.90287e-07	ABCA2
rs7437055	4	100995253	A	G	-0.0696191	0.0131965	1.32349e-07	ABCA2
rs146141982	7	542530	G	C	0.105746	0.0215008	8.73193e-07	ABCA2
rs72678674	1	43759017	A	G	0.0428755	0.00720718	2.69793e-09	ADGRD1
rs469864	1	91076960	C	T	-0.044001	0.00777239	1.50328e-08	ADGRD1
rs1223799	1	214174543	C	T	-0.0454136	0.00838994	6.2024e-08	ADGRD1
rs903319	1	220812469	C	T	-0.0428688	0.00714871	2.01345e-09	ADGRD1
rs112265467	1	247326269	T	G	-0.147335	0.0274809	8.26e-08	ADGRD1
rs56278466	10	17833858	G	T	0.0419213	0.00664719	2.85207e-10	ADGRD1
rs1870138	10	80509855	G	A	0.07032	0.00781016	2.18323e-19	ADGRD1
rs4411227	10	93071756	G	C	-0.0456179	0.00716914	1.97742e-10	ADGRD1
rs10832558	11	16216541	G	T	-0.0446107	0.00716079	4.66864e-10	ADGRD1
rs174533	11	61781553	A	G	0.0689118	0.00661637	2.11009e-25	ADGRD1
rs11045856	12	21197755	G	T	0.0697805	0.00811633	8.14517e-18	ADGRD1
rs7966213	12	66104148	C	T	-0.0349757	0.00698565	5.53465e-07	ADGRD1
rs1169296	12	120990604	G	A	0.058103	0.00739215	3.83796e-15	ADGRD1
rs79551144	12	130962624	G	A	-0.957406	0.0192108	1e-200	ADGRD1
rs117117232	12	131006913	C	A	-0.405037	0.0360299	2.54507e-29	ADGRD1
rs12367096	12	131091094	A	G	0.221649	0.00722986	1e-200	ADGRD1
rs74553400	12	131196431	G	A	-0.246081	0.0163205	2.25996e-51	ADGRD1
rs6573778	14	24403003	C	T	-0.0345118	0.00632935	4.96215e-08	ADGRD1
rs2239222	14	72545177	G	A	0.0470757	0.00665585	1.5181e-12	ADGRD1
rs217181	16	72080103	T	C	-0.0424075	0.00795103	9.62942e-08	ADGRD1
rs55714927	17	7176997	T	C	0.0429594	0.00798628	7.48359e-08	ADGRD1
rs1801689	17	66214462	C	A	0.144043	0.0184965	6.82967e-15	ADGRD1
rs77542162	17	69085137	G	A	0.121645	0.0211146	8.35218e-09	ADGRD1
rs143393480	18	58422626	T	G	-0.164876	0.029946	3.67536e-08	ADGRD1
rs6857	19	44888997	T	C	-0.0414233	0.00840037	8.17523e-07	ADGRD1
rs1260326	2	27508073	C	T	-0.0641726	0.00647285	3.6141e-23	ADGRD1
rs7580585	2	64742673	T	C	0.0449282	0.00679506	3.79402e-11	ADGRD1
rs6706968	2	120552693	C	A	-0.0512469	0.00642558	1.51845e-15	ADGRD1
rs1800961	20	44413724	T	C	-0.164665	0.0178178	2.42773e-20	ADGRD1
rs147667955	3	12409339	T	C	-0.224303	0.0381761	4.21638e-09	ADGRD1
rs687339	3	136213517	T	C	0.0861836	0.00755846	4.0738e-30	ADGRD1
rs16860640	3	186252384	C	T	0.0530049	0.0101823	1.93361e-07	ADGRD1
rs75882443	5	9555985	G	A	0.0466955	0.00925413	4.51367e-07	ADGRD1
rs6940467	6	31474360	G	A	0.0536665	0.0107383	5.8031e-07	ADGRD1
rs396960	6	32223804	A	T	0.0363551	0.00733335	7.14069e-07	ADGRD1
rs35332062	7	73597712	A	G	-0.0850843	0.00946042	2.39001e-19	ADGRD1
rs12538820	7	99742426	A	G	-0.0543932	0.0100627	6.46606e-08	ADGRD1
rs28601761	8	125487789	G	C	-0.0565745	0.00645719	1.92708e-18	ADGRD1
rs10776862	9	135997730	G	A	-0.0376253	0.00693471	5.77431e-08	ADGRD1
rs3791101	1	43900578	A	G	0.0607892	0.00804123	4.04017e-14	AMIGO2
rs660611	1	210252164	A	G	-0.0378118	0.00745002	3.86678e-07	AMIGO2
rs56278466	10	17833858	G	T	0.0481323	0.00778673	6.35682e-10	AMIGO2
rs189034378	10	45709581	C	G	-0.0526692	0.00872303	1.56088e-09	AMIGO2
rs7096909	10	80524756	T	A	0.0582542	0.00911764	1.66775e-10	AMIGO2
rs603424	10	100315722	A	G	-0.0506542	0.0099065	3.16694e-07	AMIGO2
rs2572940	11	9703290	T	C	-0.101719	0.0206542	8.4419e-07	AMIGO2
rs174546	11	61802358	T	C	0.0631463	0.0077648	4.2092e-16	AMIGO2
rs4055121	11	126362442	T	C	-0.11801	0.0108893	2.2914e-27	AMIGO2
rs10748461	12	47110312	G	A	-0.0711758	0.0128049	2.72157e-08	AMIGO2
rs4768144	12	47215275	C	T	0.11646	0.0081965	8.10961e-46	AMIGO2
rs215384	12	47366418	G	C	0.157371	0.00763887	2.67239e-94	AMIGO2
rs2238144	12	47745568	T	C	0.0564654	0.00945294	2.32472e-09	AMIGO2
rs7137749	12	56704256	C	T	0.0520141	0.0077871	2.39718e-11	AMIGO2
rs10774625	12	111472415	G	A	-0.0829079	0.00745304	9.58297e-29	AMIGO2
rs4899172	14	65313186	C	T	0.0568149	0.00938059	1.38992e-09	AMIGO2
rs72698720	14	100712378	G	C	-0.0607865	0.0108387	2.0432e-08	AMIGO2
rs682619	15	58806574	C	T	0.052288	0.00773121	1.34927e-11	AMIGO2
rs56093546	17	7160496	A	T	0.108047	0.00927697	2.38122e-31	AMIGO2
rs2586539	17	7191771	G	C	-0.0581753	0.0106406	4.56993e-08	AMIGO2
rs77542162	17	69085137	G	A	0.165957	0.0246977	1.82306e-11	AMIGO2
rs8064597	17	81294762	G	A	-0.0463888	0.00752237	6.96931e-10	AMIGO2
rs4987767	18	63237319	C	T	-0.16713	0.0326491	3.07213e-07	AMIGO2
rs602662	19	48703728	A	G	0.0398499	0.00745701	9.0939e-08	AMIGO2
rs1524668	2	9557243	C	A	0.061741	0.00784469	3.53427e-15	AMIGO2
rs7269864	20	49480071	C	T	-0.0600905	0.00948213	2.33927e-10	AMIGO2
rs4820378	22	39473204	T	C	0.0454366	0.00753544	1.64248e-09	AMIGO2
rs1354034	3	56815721	C	T	-0.146488	0.00758697	4.6153e-83	AMIGO2
rs10935473	3	98698056	T	G	-0.177712	0.00752507	2.64241e-123	AMIGO2
rs422497	3	155834105	G	A	0.0502846	0.00859744	4.95176e-09	AMIGO2
rs2736100	5	1286401	A	C	-0.0457169	0.00742715	7.49014e-10	AMIGO2
rs1281937	6	32610366	C	T	-0.062095	0.00832232	8.57038e-14	AMIGO2
rs6920211	6	135110180	C	T	0.0493661	0.00853916	7.41959e-09	AMIGO2
rs342275	7	106718770	T	C	-0.0409393	0.00740188	3.18537e-08	AMIGO2
rs4841133	8	9326154	G	A	-0.0780362	0.0127936	1.06319e-09	AMIGO2
rs385893	9	4763176	C	T	0.0606439	0.00742894	3.26287e-16	AMIGO2
rs10967975	9	27541452	A	T	0.0436595	0.00876872	6.39131e-07	AMIGO2
rs4341217	9	93077795	G	A	0.0467937	0.00937618	6.01617e-07	AMIGO2
rs2519093	9	133266456	T	C	-0.168935	0.00958944	1.83189e-69	AMIGO2
rs11205303	1	149934520	C	T	0.0364722	0.00668585	4.89362e-08	AOC3
rs117163080	10	17803996	C	T	0.0549503	0.00948164	6.81397e-09	AOC3
rs56278466	10	17833858	G	T	0.0671283	0.00693485	3.67198e-22	AOC3
rs9414801	10	63389329	A	G	-0.0421441	0.00661289	1.85336e-10	AOC3
rs3967200	11	126362490	T	C	-0.101181	0.00968946	1.58708e-25	AOC3
rs1042704	14	22843385	A	G	-0.0922448	0.0079969	8.78213e-31	AOC3
rs12913657	15	50708771	C	T	0.0791723	0.00929677	1.65006e-17	AOC3
rs55714927	17	7176997	T	C	0.0673959	0.00913773	1.63644e-13	AOC3
rs9905251	17	41235457	G	A	0.0541605	0.00833036	7.94877e-11	AOC3
rs9900213	17	42223863	T	G	0.176502	0.00947828	2.1424e-77	AOC3
rs9252	17	42402831	A	G	-0.451628	0.0124945	1e-200	AOC3
rs34107025	17	42856648	C	T	-0.876689	0.0299578	2.96483e-188	AOC3
rs76305463	17	42864869	C	A	-0.727222	0.0281339	2.52348e-147	AOC3
rs138188004	17	43146393	T	C	0.141382	0.0190454	1.14156e-13	AOC3
rs117459052	17	43424487	A	G	-0.244295	0.0234581	2.13895e-25	AOC3
rs112502880	17	69138665	C	T	0.0975705	0.0173134	1.74518e-08	AOC3
rs7220767	17	78373122	C	A	0.0491157	0.00898847	4.64751e-08	AOC3
rs142926021	21	30043709	G	T	-0.205953	0.0393351	1.64221e-07	AOC3
rs738408	22	43928850	T	C	0.0507067	0.0079558	1.84697e-10	AOC3
rs2270894	3	9933702	G	C	0.0809628	0.00849009	1.48218e-21	AOC3
rs17460016	3	172056811	C	G	0.0376167	0.00670974	2.06724e-08	AOC3
rs13135092	4	102276925	G	A	0.085997	0.0119917	7.42506e-13	AOC3
rs4702121	5	16031690	G	T	0.0412	0.00764787	7.15946e-08	AOC3
rs62386711	6	14109329	A	G	-0.0405267	0.00795498	3.49639e-07	AOC3
rs72845126	6	29948510	T	G	0.0636505	0.0108833	4.96089e-09	AOC3
rs767298	7	7234953	T	G	-0.0652354	0.00692058	4.24913e-21	AOC3
rs11509880	7	12222285	A	G	0.0351993	0.00701102	5.15205e-07	AOC3
rs13228906	7	130757125	A	G	-0.0387536	0.0065698	3.66252e-09	AOC3
rs7843987	8	11564621	C	T	-0.0335858	0.00660769	3.71843e-07	AOC3
rs73672923	8	22855002	G	A	-0.0382498	0.00761857	5.15098e-07	AOC3
rs9411365	9	133242881	G	C	0.0982598	0.0129153	2.78356e-14	AOC3
rs10839796	11	7519705	T	C	-0.037701	0.00763427	7.87735e-07	ARG2
rs4759076	12	54336088	C	T	0.0544345	0.00768332	1.39284e-12	ARG2
rs61990120	14	67622703	A	G	0.0834862	0.0110515	4.21211e-14	ARG2
rs114694170	5	88884379	C	T	0.0890995	0.0161584	3.50502e-08	ARG2
rs342293	7	106731773	G	C	-0.0481751	0.00759395	2.24063e-10	ARG2
rs13257521	8	9174485	G	C	0.083885	0.00932863	2.42326e-19	ARG2
rs7184093	16	11003992	A	G	-0.0408617	0.00801505	3.43052e-07	ARNT
rs10797300	16	28595875	A	G	0.0640605	0.0118076	5.78309e-08	ARNT
rs28372932	16	31328304	A	G	0.0519591	0.00812018	1.56639e-10	ARNT
rs76586925	17	48120806	A	G	-0.10428	0.0207108	4.77738e-07	ARNT
rs3763321	6	32438927	G	T	0.0556785	0.00960983	6.87654e-09	ARNT
rs149875464	8	38007261	A	G	0.140592	0.0277738	4.14782e-07	ARNT
rs76581579	13	26891966	C	T	-0.146292	0.0281689	2.06509e-07	ATP6V1G2
rs140507001	19	45628397	A	G	-0.241065	0.047756	4.46797e-07	ATP6V1G2
rs2239705	6	31545625	A	G	0.204384	0.0106679	8.1903e-82	ATP6V1G2
rs61747728	1	179557079	T	C	0.154789	0.0189604	3.24564e-16	ATRAID
rs78444298	1	184702964	A	G	0.433773	0.026546	5.08862e-60	ATRAID
rs115585866	1	184748439	G	A	0.129562	0.0252409	2.85135e-07	ATRAID
rs2486635	10	28501522	A	G	-0.0427586	0.00859129	6.45877e-07	ATRAID
rs6650327	13	95428561	T	C	0.0436852	0.00790503	3.2713e-08	ATRAID
rs9525349	13	114042599	C	T	0.0396037	0.00724164	4.52866e-08	ATRAID
rs59865887	15	29695635	T	C	0.0633101	0.0125307	4.36305e-07	ATRAID
rs35650857	16	20350169	T	C	-0.0819296	0.00942506	3.53834e-18	ATRAID
rs1136201	17	39723335	G	A	0.0465073	0.00837336	2.78888e-08	ATRAID
rs1801689	17	66214462	C	A	0.12992	0.0212193	9.1992e-10	ATRAID
rs79650829	2	26701414	A	G	-0.287556	0.0290739	4.5772e-23	ATRAID
rs138043913	2	26715029	T	C	0.301043	0.0275176	7.41822e-28	ATRAID
rs62130544	2	27088033	T	A	-0.162048	0.0247807	6.18016e-11	ATRAID
rs1275541	2	27166327	G	A	-0.272874	0.0080933	1e-200	ATRAID
rs62143060	2	28387208	C	T	0.22825	0.0254279	2.79834e-19	ATRAID
rs75166367	2	162107791	A	G	-0.0829962	0.0155942	1.0249e-07	ATRAID
rs2870238	4	76451926	T	C	0.0385451	0.00722371	9.50605e-08	ATRAID
rs13153019	5	177355217	C	T	0.0435867	0.00847651	2.71738e-07	ATRAID
rs9791871	7	140399832	G	T	0.0454362	0.00730347	4.93412e-10	ATRAID
rs73158188	7	151718147	T	C	0.0477775	0.00800975	2.44754e-09	ATRAID
rs36071802	8	23858358	C	T	0.0386346	0.00748171	2.41897e-07	ATRAID
rs587600964	9	133296749	G	C	-0.0608966	0.0113071	7.21622e-08	ATRAID
rs332192	10	28633010	C	T	-0.0448458	0.00787627	1.24251e-08	BAMBI
rs11001574	10	76007479	C	T	-0.048698	0.00930209	1.64839e-07	BAMBI
rs3184504	12	111446804	C	T	-0.0374117	0.00753283	6.81773e-07	BAMBI
rs34882080	16	20350119	G	A	-0.0524706	0.00983301	9.49314e-08	BAMBI
rs2230429	16	31363214	G	C	0.0453923	0.00796537	1.20726e-08	BAMBI
rs1354034	3	56815721	C	T	-0.0637145	0.00770246	1.31765e-16	BAMBI
rs9269165	6	32479066	G	A	0.0536957	0.00868588	6.33155e-10	BAMBI
rs9270074	6	32586352	C	T	0.0588473	0.0105251	2.25611e-08	BAMBI
rs333947	1	109928142	A	G	-0.0475014	0.00952877	6.19455e-07	BLMH
rs7107356	11	47654618	G	A	0.0401548	0.0067897	3.33741e-09	BLMH
rs77461879	11	65528811	C	G	-0.0787556	0.0145511	6.22071e-08	BLMH
rs28762087	12	95862483	A	G	0.0452145	0.00920778	9.08594e-07	BLMH
rs1712355	14	34878306	G	T	-0.0338584	0.00676269	5.5386e-07	BLMH
rs149244009	17	27903138	G	A	-0.255894	0.0439784	5.93321e-09	BLMH
rs145924627	17	29563064	C	T	-0.244392	0.0379512	1.19754e-10	BLMH
rs4474742	17	29738560	T	A	0.224404	0.00736292	1e-200	BLMH
rs112699332	17	30257073	C	G	0.426634	0.0254439	4.2092e-63	BLMH
rs150812480	17	30387208	A	C	-0.18264	0.0294621	5.67636e-10	BLMH
rs188492388	17	30516287	A	G	-0.265358	0.0400465	3.4435e-11	BLMH
rs9906015	17	30970193	C	T	0.351299	0.0241166	4.57404e-48	BLMH
rs148033030	17	31450765	G	A	0.167818	0.0250141	1.96065e-11	BLMH
rs143452099	17	31712779	A	G	-0.446684	0.0517698	6.22874e-18	BLMH
rs1250258	2	215435462	T	C	0.0619358	0.00769451	8.32339e-16	BLMH
rs145983667	20	40225142	T	C	-0.133645	0.027042	7.72787e-07	BLMH
rs370628431	3	51021765	A	G	0.504316	0.0428899	6.39293e-32	BLMH
rs13303	3	52523992	C	T	0.0895134	0.00686673	7.65597e-39	BLMH
rs7614578	3	194880409	G	A	-0.0341237	0.00693885	8.75326e-07	BLMH
rs652839	5	131945413	C	G	0.043869	0.00858361	3.20826e-07	BLMH
rs915651	6	31781407	A	G	-0.0833373	0.0101014	1.58343e-16	BLMH
rs62440278	6	144945485	G	A	0.164036	0.0317039	2.29118e-07	BLMH
rs144948340	6	159293340	C	T	0.144792	0.0290554	6.25043e-07	BLMH
rs4721675	7	17965079	C	T	0.0340108	0.00680066	5.70033e-07	BLMH
rs665822	8	19168542	A	G	0.0353523	0.00682609	2.2308e-07	BLMH
rs2393967	10	63373396	C	A	0.0426458	0.00802929	1.0886e-07	BOLA2
rs10876550	12	54318524	A	G	0.0394432	0.00748299	1.35644e-07	BOLA2
rs10774624	12	111395984	A	G	-0.0422518	0.00747392	1.57456e-08	BOLA2
rs76840156	16	29954115	T	C	-0.206227	0.0264051	5.71216e-15	BOLA2
rs111894927	16	30349780	C	A	-0.382903	0.040504	3.27793e-21	BOLA2
rs138384839	16	30546390	A	G	-0.208138	0.0341235	1.0637e-09	BOLA2
rs7641175	3	18269920	A	G	0.046504	0.00905904	2.84512e-07	BOLA2
rs1354034	3	56815721	C	T	0.0573445	0.00755688	3.23892e-14	BOLA2
rs4575955	4	164843538	T	G	-0.0379334	0.00757614	5.52968e-07	BOLA2
rs342293	7	106731773	G	C	-0.0369758	0.00743301	6.54034e-07	BOLA2
rs692503	9	4745675	A	G	0.0387294	0.00754979	2.89948e-07	BOLA2
rs2393967	10	63373396	C	A	0.0426458	0.00802929	1.0886e-07	BOLA2B
rs10876550	12	54318524	A	G	0.0394432	0.00748299	1.35644e-07	BOLA2B
rs10774624	12	111395984	A	G	-0.0422518	0.00747392	1.57456e-08	BOLA2B
rs76840156	16	29954115	T	C	-0.206227	0.0264051	5.71216e-15	BOLA2B
rs111894927	16	30349780	C	A	-0.382903	0.040504	3.27793e-21	BOLA2B
rs138384839	16	30546390	A	G	-0.208138	0.0341235	1.0637e-09	BOLA2B
rs7641175	3	18269920	A	G	0.046504	0.00905904	2.84512e-07	BOLA2B
rs1354034	3	56815721	C	T	0.0573445	0.00755688	3.23892e-14	BOLA2B
rs4575955	4	164843538	T	G	-0.0379334	0.00757614	5.52968e-07	BOLA2B
rs342293	7	106731773	G	C	-0.0369758	0.00743301	6.54034e-07	BOLA2B
rs692503	9	4745675	A	G	0.0387294	0.00754979	2.89948e-07	BOLA2B
rs72550870	1	11046609	C	T	-0.123708	0.0165027	6.5675e-14	C1QTNF9
rs138448626	1	23757745	T	C	0.0586059	0.0113592	2.47805e-07	C1QTNF9
rs2821359	1	200035395	C	T	0.0368185	0.00678238	5.68159e-08	C1QTNF9
rs11259539	10	15197030	C	T	0.0666157	0.0057743	8.6278e-31	C1QTNF9
rs61869114	10	114756486	T	C	-0.0617486	0.0124744	7.42062e-07	C1QTNF9
rs7127347	11	17279297	G	T	0.0557357	0.00910159	9.14071e-10	C1QTNF9
rs72926467	11	68047376	T	C	0.0829207	0.0156344	1.13457e-07	C1QTNF9
rs34896222	12	123353560	A	C	-0.0608248	0.0118514	2.86246e-07	C1QTNF9
rs117183556	13	24287768	A	G	-0.609123	0.0170082	1e-200	C1QTNF9
rs9553239	13	24325107	A	G	0.476246	0.0364922	6.30376e-39	C1QTNF9
rs73170357	13	24339926	A	G	0.324049	0.0195268	7.55614e-62	C1QTNF9
rs372369868	13	24355398	A	G	-0.882222	0.0271227	1e-200	C1QTNF9
rs116955514	13	24367917	G	A	-0.81108	0.0300227	9.7051e-161	C1QTNF9
rs75344620	13	24439907	C	G	0.357902	0.0299153	5.49541e-33	C1QTNF9
rs75574535	13	24454625	T	G	-0.591552	0.027286	3.1842e-104	C1QTNF9
rs9511315	13	24520811	C	T	0.261101	0.0320449	3.70084e-16	C1QTNF9
rs143139444	13	24532604	C	T	0.343529	0.0238382	4.42079e-47	C1QTNF9
rs112858409	13	24546025	A	G	0.242498	0.0255128	2.00078e-21	C1QTNF9
rs139054775	13	24633685	A	T	0.373103	0.035942	3.03529e-25	C1QTNF9
rs17081002	13	24688148	G	A	0.214426	0.0308859	3.85212e-12	C1QTNF9
rs11072508	15	74770056	T	C	0.0363476	0.00608542	2.33083e-09	C1QTNF9
rs72815283	16	54485429	T	G	0.0751505	0.0152996	9.01841e-07	C1QTNF9
rs13333582	16	67515644	C	T	0.0974187	0.0141105	5.05592e-12	C1QTNF9
rs4468599	16	88585854	T	G	-0.0331773	0.00591106	1.99145e-08	C1QTNF9
rs10420556	19	41400365	G	A	0.0294207	0.00580951	4.10053e-07	C1QTNF9
rs12975366	19	54255498	C	T	-0.0423091	0.00580616	3.1703e-13	C1QTNF9
rs150631587	2	12139169	G	T	0.0695351	0.0140551	7.52471e-07	C1QTNF9
rs1260326	2	27508073	C	T	0.0326556	0.00582121	2.02605e-08	C1QTNF9
rs10510410	3	12305239	C	A	-0.0450934	0.00663727	1.09094e-11	C1QTNF9
rs6438753	3	122661875	A	C	0.049958	0.00950827	1.48696e-07	C1QTNF9
rs73185701	3	186840614	C	G	0.05395	0.0104865	2.6796e-07	C1QTNF9
rs7665420	4	16868187	A	G	-0.0320364	0.00570324	1.94039e-08	C1QTNF9
rs13108536	4	158995771	T	C	-0.0327717	0.00628521	1.84718e-07	C1QTNF9
rs78449139	5	56468354	A	G	0.095395	0.0194522	9.38707e-07	C1QTNF9
rs6452446	5	72395201	A	C	-0.0548713	0.00884398	5.49161e-10	C1QTNF9
rs27289	5	97010574	T	G	-0.0607353	0.00572573	2.75169e-26	C1QTNF9
rs2524096	6	31268690	T	G	-0.0696426	0.00577069	1.55274e-33	C1QTNF9
rs9266613	6	31378088	C	T	-0.064013	0.0071752	4.60363e-19	C1QTNF9
rs1404422	7	17795362	C	A	-0.0344098	0.00567594	1.34107e-09	C1QTNF9
rs150628752	11	30749391	T	C	-0.116524	0.0237086	8.88587e-07	C5
rs118095221	17	20631761	T	C	-0.139788	0.0279653	5.77378e-07	C5
rs780094	2	27518370	C	T	-0.0624649	0.00776656	8.78011e-16	C5
rs10984915	9	120443305	T	G	0.0659464	0.013481	9.99217e-07	C5
rs4837810	9	121118921	C	T	-0.142986	0.00765242	6.54787e-78	C5
rs146856892	9	121387967	G	A	-0.105527	0.02149	9.08427e-07	C5
rs3003333	1	23867524	T	A	-0.0361655	0.0071637	4.45431e-07	C6orf58
rs114709473	1	168776662	G	C	0.0518301	0.00894992	6.99166e-09	C6orf58
rs908702	1	206932296	T	C	0.100385	0.00717101	1.58745e-44	C6orf58
rs12023563	1	210262765	A	G	0.0414479	0.00787192	1.39975e-07	C6orf58
rs6696318	1	236310731	G	A	0.03588	0.00713528	4.94254e-07	C6orf58
rs667355	1	236493906	G	A	0.0399564	0.00777598	2.77019e-07	C6orf58
rs56278466	10	17833858	G	T	0.0744925	0.00749861	2.95597e-23	C6orf58
rs72836136	10	122631205	C	T	0.0859492	0.0165311	2.00111e-07	C6orf58
rs7948465	11	10818042	A	G	-0.0636768	0.0127464	5.86314e-07	C6orf58
rs2956074	11	34843333	C	T	-0.0579662	0.00725775	1.38484e-15	C6orf58
rs4937126	11	126412002	A	G	-0.0792852	0.00764759	3.4906e-25	C6orf58
rs838968	12	11215476	G	A	-0.164092	0.0187584	2.17871e-18	C6orf58
rs4761529	12	93813418	G	A	-0.0553591	0.00814455	1.06758e-11	C6orf58
rs72656460	13	106418497	C	T	0.0752952	0.015285	8.3888e-07	C6orf58
rs848125	14	36778607	G	T	0.10344	0.00718257	5.05708e-47	C6orf58
rs2842329	14	68550878	G	T	0.0548219	0.00812268	1.48628e-11	C6orf58
rs12887451	14	104725689	G	C	0.0417714	0.00723779	7.86702e-09	C6orf58
rs483342	15	49755537	A	C	0.04426	0.00715164	6.06248e-10	C6orf58
rs4786325	16	2823312	C	T	-0.0492027	0.00763203	1.14188e-10	C6orf58
rs447205	16	86733280	A	G	-0.036998	0.00723335	3.1387e-07	C6orf58
rs12955789	18	22034365	A	G	-0.0602949	0.0113051	9.63807e-08	C6orf58
rs11664445	18	35702036	T	G	-0.0568784	0.0115389	8.25411e-07	C6orf58
rs111994811	19	5772328	T	C	0.157386	0.0198687	2.35072e-15	C6orf58
rs112742683	19	5813755	A	G	0.815068	0.018282	1e-200	C6orf58
rs34262244	19	17795098	A	G	-0.0564212	0.00834245	1.35021e-11	C6orf58
rs679574	19	48702851	G	C	0.239461	0.0075113	1e-200	C6orf58
rs12991732	2	43418672	C	G	-0.0551579	0.00807791	8.59607e-12	C6orf58
rs155568	2	59692142	G	T	-0.0369795	0.00754354	9.47982e-07	C6orf58
rs2861182	2	66846712	G	A	-0.0431148	0.00773613	2.50138e-08	C6orf58
rs10932472	2	213173578	G	A	0.0840371	0.0139873	1.87728e-09	C6orf58
rs117059213	21	41307996	A	C	0.109085	0.0194341	1.98733e-08	C6orf58
rs56216140	3	188034753	T	C	-0.0383215	0.00722028	1.11153e-07	C6orf58
rs4362858	4	40422196	C	T	-0.0650517	0.00792259	2.19533e-16	C6orf58
rs12500456	4	55561053	T	C	-0.0530381	0.00770299	5.76235e-12	C6orf58
rs7447651	5	35268207	T	C	-0.0541281	0.00738685	2.34261e-13	C6orf58
rs4866776	5	44525487	T	A	-0.0547249	0.0085071	1.2523e-10	C6orf58
rs2059780	5	135187287	A	G	-0.0388992	0.00716499	5.665e-08	C6orf58
rs1196393	6	2259421	A	G	-0.111234	0.00741787	7.8759e-51	C6orf58
rs2006173	6	28937835	G	A	-0.0415406	0.00735115	1.5961e-08	C6orf58
rs3104409	6	32715344	A	G	-0.0419067	0.00844494	6.9645e-07	C6orf58
rs60007869	6	52523540	C	A	-0.0383134	0.00739696	2.22341e-07	C6orf58
rs150523661	6	127332724	T	A	-0.351764	0.0377206	1.10433e-20	C6orf58
rs11154410	6	127457700	T	C	0.247329	0.00754313	1e-200	C6orf58
rs77864086	6	127575662	A	G	0.218682	0.0195472	4.70219e-29	C6orf58
rs143743701	6	127788051	T	A	-0.202305	0.0308619	5.55776e-11	C6orf58
rs146189532	6	127793542	T	C	-0.207236	0.0324182	1.63106e-10	C6orf58
rs11755520	6	127845704	C	A	-0.198977	0.0379143	1.53699e-07	C6orf58
rs117629901	6	127933099	A	G	0.212225	0.0303037	2.50035e-12	C6orf58
rs151241424	6	127980167	A	G	-0.117167	0.0225997	2.16636e-07	C6orf58
rs17057244	6	129396082	G	A	0.110829	0.021478	2.46808e-07	C6orf58
rs117389151	7	17557276	C	G	0.122401	0.0233751	1.63746e-07	C6orf58
rs12533016	7	98220336	C	T	0.0778229	0.00725726	7.89951e-27	C6orf58
rs4515482	7	107432236	C	A	0.0460049	0.00847836	5.75811e-08	C6orf58
rs800548	8	115807661	A	G	0.0451037	0.00820406	3.84707e-08	C6orf58
rs1847544	8	121218807	T	C	0.0504784	0.0100242	4.76201e-07	C6orf58
rs12378344	9	136202325	C	G	0.0355571	0.00710571	5.615e-07	C6orf58
rs3811444	1	247876149	T	C	0.0380759	0.00764181	6.27437e-07	CA2
rs17466501	12	23546712	G	A	0.0438809	0.00889976	8.19898e-07	CA2
rs2118594	3	68149702	T	C	-0.0453404	0.00917658	7.77696e-07	CA2
rs117509145	8	84825918	A	G	-0.222571	0.0382385	5.86408e-09	CA2
rs2980370	8	85847898	G	A	0.101739	0.00723348	6.23448e-45	CA2
rs66489920	8	105580311	C	T	-0.0527518	0.0079781	3.78966e-11	CA2
rs11552522	16	75293813	G	A	0.086528	0.0175789	8.5548e-07	CAPS
rs143117009	19	5914459	A	G	0.313764	0.0276249	6.76706e-30	CAPS
rs76684796	19	5919568	A	T	0.198504	0.0309231	1.36915e-10	CAPS
rs74792734	19	5966123	A	G	-0.176771	0.0114684	1.32373e-53	CAPS
rs35827484	2	68969871	A	G	0.0846172	0.0171465	8.01697e-07	CAPS
rs55866046	2	69892946	C	G	-0.0559142	0.00902334	5.76899e-10	CAPS
rs1050152	5	132340627	T	C	-0.0401399	0.00718852	2.35185e-08	CAPS
rs3094116	6	30770631	T	A	-0.0615715	0.00801818	1.60361e-14	CAPS
rs9268833	6	32460285	T	C	0.255586	0.00780594	1e-200	CAPS
rs72847642	6	32574294	T	C	-0.12413	0.0110939	4.6153e-29	CAPS
rs792813	6	80853327	G	A	-0.0375061	0.00727501	2.53e-07	CAPS
rs36053974	1	118247510	G	A	0.120241	0.0238063	4.39967e-07	CBS
rs10883451	10	100164661	C	T	-0.0448763	0.00754957	2.77773e-09	CBS
rs4753124	11	94090069	G	C	-0.0686742	0.0122647	2.15179e-08	CBS
rs12438527	15	100078028	T	A	-0.104082	0.0204975	3.81839e-07	CBS
rs59170434	18	38673028	G	C	-0.042879	0.0081199	1.28671e-07	CBS
rs4940391	18	58438636	G	A	-0.0531469	0.00991892	8.40853e-08	CBS
rs739846	19	19308262	A	G	0.0774297	0.0143033	6.18358e-08	CBS
rs76007960	19	45090031	T	G	0.051352	0.0102732	5.77338e-07	CBS
rs1800961	20	44413724	T	C	0.110825	0.0213382	2.06129e-07	CBS
rs11700748	21	43052952	T	C	0.0461965	0.00763434	1.4382e-09	CBS
rs6586281	21	43058283	A	G	0.155739	0.00996041	4.15432e-55	CBS
rs3747207	22	43928975	A	G	0.104846	0.00920354	4.58987e-30	CBS
rs180908641	3	132970203	C	G	-0.166601	0.0338304	8.45376e-07	CBS
rs4835265	4	145900258	A	C	0.0818981	0.0104322	4.14381e-15	CBS
rs7450517	6	54038045	A	G	-0.0404436	0.00826161	9.81228e-07	CBS
rs116955584	8	10349597	T	C	0.0947458	0.0190153	6.27336e-07	CBS
rs10733608	9	114386150	T	G	-0.0462174	0.00766546	1.64661e-09	CBS
rs11589479	1	155060832	A	G	0.0402536	0.00807715	6.24022e-07	CCL25
rs7478680	11	2202130	T	C	0.0430196	0.00866984	6.9775e-07	CCL25
rs7295693	12	467630	C	T	0.123149	0.006074	2.14981e-91	CCL25
rs12423080	12	553110	T	C	-0.0646558	0.00979688	4.12192e-11	CCL25
rs2373333	12	100411857	C	T	-0.0362731	0.00599283	1.4239e-09	CCL25
rs77915354	15	92091427	A	G	0.0833657	0.0167226	6.18942e-07	CCL25
rs111072793	17	7176274	A	C	0.0528219	0.00741977	1.08643e-12	CCL25
rs7223866	17	9882029	G	C	0.0435291	0.00632919	6.09116e-12	CCL25
rs112001035	17	68827664	A	G	-0.100429	0.0126689	2.24182e-15	CCL25
rs41285780	19	7909980	A	G	0.594311	0.0154029	1e-200	CCL25
rs117424304	19	7910202	A	G	0.377565	0.0366563	7.0372e-25	CCL25
rs74176259	19	7946257	T	C	-0.357504	0.0292897	2.89534e-34	CCL25
rs34557917	19	7968233	C	A	-0.392564	0.0292386	4.24522e-41	CCL25
rs3136652	19	8054172	T	C	0.291212	0.00965674	8.85116e-200	CCL25
rs35619681	19	8162402	T	C	-0.101848	0.0139938	3.38688e-13	CCL25
rs118101126	19	8255303	A	G	0.301336	0.0228937	1.44444e-39	CCL25
rs10425879	19	48588621	A	G	-0.20194	0.0391678	2.52586e-07	CCL25
rs411482	19	48600190	T	C	-0.265664	0.00741653	1e-200	CCL25
rs116617472	19	48764480	C	G	0.148237	0.017813	8.65964e-17	CCL25
rs4459651	19	48821778	T	C	-0.0785107	0.00821005	1.14657e-21	CCL25
rs6087868	20	32300072	A	G	-0.0636559	0.00786962	6.0256e-16	CCL25
rs6853156	4	56908677	T	C	-0.0501178	0.00768359	6.90558e-11	CCL25
rs254574	5	135096700	G	A	-0.0376116	0.00610171	7.08827e-10	CCL25
rs199705602	6	32638807	G	A	-0.0352073	0.00602713	5.17428e-09	CCL25
rs9275576	6	32711549	T	C	0.0620944	0.0084863	2.53571e-13	CCL25
rs11751347	6	160671406	T	C	-0.062468	0.00978923	1.75586e-10	CCL25
rs569706339	6	160748028	C	T	-0.196042	0.0244797	1.16252e-15	CCL25
rs4731532	7	128932712	A	G	0.0300821	0.00592257	3.78975e-07	CCL25
rs4840982	8	8533310	A	T	0.0303666	0.00596313	3.53574e-07	CCL25
rs78061563	8	10721822	A	G	0.0941407	0.0114684	2.23666e-16	CCL25
rs8178687	8	42202706	G	A	-0.0656122	0.0109135	1.83202e-09	CCL25
rs118062058	8	42245860	G	A	-0.149896	0.0129483	5.425e-31	CCL25
rs71498417	9	80770489	T	A	0.10329	0.0203298	3.76011e-07	CCL25
rs2519093	9	133266456	T	C	-0.273117	0.00778783	1e-200	CCL25
rs12739904	1	59203816	C	T	-0.0409619	0.00749587	4.6397e-08	CCN3
rs1867073	10	98033255	A	G	-0.0378863	0.0074461	3.61718e-07	CCN3
rs11172113	12	57133500	C	T	0.0494669	0.00688899	6.94225e-13	CCN3
rs77924615	16	20381010	A	G	-0.052354	0.0086444	1.39191e-09	CCN3
rs60284187	19	49558279	T	C	0.0690918	0.012961	9.78183e-08	CCN3
rs1260326	2	27508073	C	T	0.0422402	0.0069693	1.35363e-09	CCN3
rs112694524	2	43226582	A	G	0.0833469	0.0135116	6.89287e-10	CCN3
rs1518492	4	72568158	A	G	-0.0333452	0.00681056	9.77575e-07	CCN3
rs116314028	5	187497	T	C	0.0567695	0.0114326	6.84983e-07	CCN3
rs57734033	5	3005492	T	C	0.086501	0.0175813	8.65107e-07	CCN3
rs9269165	6	32479066	G	A	0.0392057	0.00780526	5.08757e-07	CCN3
rs34271262	8	9354909	G	A	0.0421813	0.00856504	8.44365e-07	CCN3
rs72682425	8	119082237	A	C	0.0759344	0.00997655	2.71394e-14	CCN3
rs17789242	8	119337010	C	G	0.141865	0.0190462	9.44278e-14	CCN3
rs2100837	8	119380073	C	A	-0.262863	0.00816421	1e-200	CCN3
rs16892488	8	119393232	A	G	-0.306146	0.0326613	7.02587e-21	CCN3
rs139806626	8	119400134	A	G	-0.310754	0.0338256	4.04203e-20	CCN3
rs62528898	8	119588105	G	C	0.117631	0.0233321	4.61626e-07	CCN3
rs142952437	8	119792402	T	C	-0.259048	0.0312078	1.03467e-16	CCN3
rs7827593	8	133012217	A	G	0.0782217	0.0103182	3.43005e-14	CCN3
rs57209039	8	141648542	G	A	0.0363582	0.00730623	6.48022e-07	CCN3
rs12092099	1	247858854	A	G	0.0520508	0.00823723	2.63312e-10	CD2AP
rs10774625	12	111472415	G	A	-0.0399311	0.00713945	2.23146e-08	CD2AP
rs140625045	17	63076404	G	A	-0.102153	0.0204169	5.63417e-07	CD2AP
rs1354034	3	56815721	C	T	0.0629825	0.00730419	6.53431e-18	CD2AP
rs113900142	4	144049876	C	G	0.104221	0.0206008	4.2124e-07	CD2AP
rs7734027	5	77877698	A	G	-0.0379069	0.00768397	8.08779e-07	CD2AP
rs1931833	6	47459545	A	T	0.301679	0.00818534	1e-200	CD2AP
rs55716297	6	47937776	A	G	-0.101788	0.011909	1.26183e-17	CD2AP
rs62410700	6	48460565	G	A	0.0806543	0.0152202	1.16335e-07	CD2AP
rs7758845	6	135107399	C	A	0.04641	0.00823073	1.71412e-08	CD2AP
rs6961069	7	80589645	T	C	0.0382523	0.00733396	1.8305e-07	CD2AP
rs6993770	8	105569300	T	A	-0.0442437	0.00793057	2.42064e-08	CD2AP
rs692502	9	4745645	A	G	0.0385887	0.0073071	1.28496e-07	CD2AP
rs263531	1	2233496	T	G	0.0405784	0.00714387	1.34555e-08	CD8A
rs2147324	1	150283177	C	T	-0.0387203	0.00717218	6.71336e-08	CD8A
rs60886652	1	240634780	T	C	0.146223	0.0284798	2.83237e-07	CD8A
rs12360863	11	11289644	T	C	-0.0565231	0.00828365	8.88792e-12	CD8A
rs3184504	12	111446804	C	T	-0.0637462	0.00711239	3.16811e-19	CD8A
rs11632948	15	70452098	T	C	0.0360577	0.00734098	9.02298e-07	CD8A
rs17609551	16	3228439	C	A	-0.0522599	0.0100531	2.01016e-07	CD8A
rs4889362	16	81674184	A	G	0.0388544	0.00770828	4.64045e-07	CD8A
rs8066301	17	35449337	A	C	0.0481059	0.00788784	1.06908e-09	CD8A
rs62147716	2	86097627	C	A	-0.286848	0.0300441	1.32801e-21	CD8A
rs112280980	2	86167899	C	T	0.138855	0.0247189	1.93874e-08	CD8A
rs7594955	2	86554818	C	T	0.220923	0.0239076	2.44963e-20	CD8A
rs34933869	2	86695274	C	T	0.339297	0.0102916	1e-200	CD8A
rs115055789	2	86817682	G	A	-0.173917	0.0262876	3.69233e-11	CD8A
rs1076296	22	30365309	A	G	0.0626246	0.0113975	3.9167e-08	CD8A
rs35136070	22	41041875	T	C	0.227035	0.0462931	9.37627e-07	CD8A
rs6881270	5	35878993	T	C	-0.0680335	0.00804209	2.68102e-17	CD8A
rs7705093	5	96954943	T	C	0.0378413	0.00722809	1.64706e-07	CD8A
rs2523932	6	29965382	G	A	0.106561	0.0129856	2.28455e-16	CD8A
rs28732090	6	31066086	G	C	0.443901	0.0128712	1e-200	CD8A
rs2596475	6	31358547	T	C	0.138583	0.00748506	1.57326e-76	CD8A
rs1042140	6	33080863	G	A	0.0536584	0.00921859	5.86111e-09	CD8A
rs1483573	8	78711382	G	A	-0.0489619	0.00824409	2.86715e-09	CD8A
rs11137467	9	88954333	T	G	0.0874406	0.0169411	2.45059e-07	CD8A
rs6478117	9	114899864	G	A	-0.0398041	0.00722303	3.57355e-08	CD8A
rs10819317	9	127906678	G	A	-0.0524021	0.00964487	5.53656e-08	CD8A
rs507666	9	133273983	A	G	-0.0453663	0.00924693	9.29073e-07	CD8A
rs117001788	14	106374517	T	C	0.122384	0.0233259	1.54842e-07	CDC123
rs12956502	18	9722245	G	T	0.0652977	0.0127	2.72471e-07	CDC123
rs12606261	18	27040573	A	G	-0.0453813	0.00815307	2.60417e-08	CDC123
rs12543144	8	134297621	T	A	0.102929	0.0206294	6.05648e-07	CDC123
rs713451	1	118954156	A	G	-0.0447909	0.00760178	3.81171e-09	CDON
rs117163080	10	17803996	C	T	0.0671569	0.0104604	1.36157e-10	CDON
rs56278466	10	17833858	G	T	0.0512563	0.00766836	2.32274e-11	CDON
rs10826766	10	30119282	C	T	0.0429251	0.00760713	1.67363e-08	CDON
rs511950	11	125572781	A	G	-0.0528396	0.0101489	1.92509e-07	CDON
rs7104745	11	126003207	A	G	-0.0860727	0.00737634	1.84077e-31	CDON
rs607980	11	126132788	A	G	-0.181058	0.0125689	4.79844e-47	CDON
rs74612335	11	126368738	C	T	-0.0907722	0.0108581	6.28058e-17	CDON
rs215224	12	481283	C	T	0.0516805	0.00743323	3.58592e-12	CDON
rs414755	14	36073387	A	G	-0.0365473	0.00735584	6.74808e-07	CDON
rs55714927	17	7176997	T	C	0.0719158	0.00919519	5.23962e-15	CDON
rs704	17	28367840	A	G	-0.0439933	0.00727715	1.49036e-09	CDON
rs72787066	2	38027121	T	C	0.0819574	0.0164146	5.9458e-07	CDON
rs4293602	2	48505805	G	A	0.0450827	0.00796736	1.5276e-08	CDON
rs3747207	22	43928975	A	G	0.045429	0.00881792	2.57875e-07	CDON
rs13107325	4	102267552	T	C	0.0742386	0.0138907	9.06776e-08	CDON
rs72718085	4	137390830	T	C	-0.0751611	0.0146589	2.93873e-07	CDON
rs12125238	1	27041635	C	T	0.123572	0.0216333	1.1156e-08	CFB
rs2228145	1	154454494	C	A	-0.0491006	0.0071278	5.63378e-12	CFB
rs10801552	1	196640132	C	T	0.185124	0.00833062	2.09894e-109	CFB
rs746463	11	110125219	T	C	-0.0380876	0.00762193	5.81996e-07	CFB
rs28562608	14	70247310	T	A	0.0378774	0.00711032	9.97953e-08	CFB
rs11630129	15	81930533	G	A	-0.0435361	0.00818771	1.05351e-07	CFB
rs10408682	19	6699319	T	C	0.0729025	0.0101197	5.84655e-13	CFB
rs12975366	19	54255498	C	T	-0.0488781	0.00711663	6.50429e-12	CFB
rs1260326	2	27508073	C	T	-0.0668529	0.00714151	7.88497e-21	CFB
rs55709272	2	113109711	C	T	0.0460943	0.00701442	4.9854e-11	CFB
rs13024536	2	187511525	G	A	0.0400009	0.00814241	8.98442e-07	CFB
rs2224538	20	39923436	C	T	-0.0365762	0.00727482	4.96181e-07	CFB
rs4817988	21	39096912	A	G	-0.0418518	0.00786846	1.04381e-07	CFB
rs10033900	4	109737911	C	T	0.0497056	0.00697568	1.03657e-12	CFB
rs189520	5	107569364	T	C	0.035595	0.00719166	7.44098e-07	CFB
rs11575846	6	31710296	C	G	0.58989	0.0188493	1e-200	CFB
rs56280220	6	31829645	C	G	0.45376	0.0349146	1.28469e-38	CFB
rs114508013	6	31900988	A	G	-0.754664	0.0218186	1e-200	CFB
rs41285751	6	31932038	T	G	0.592861	0.0198877	2.86418e-195	CFB
rs146280229	6	32049830	C	G	-0.731514	0.032269	8.99498e-114	CFB
rs77795650	6	32484306	A	G	0.32742	0.017542	9.54993e-78	CFB
rs189790276	6	32625931	T	C	0.100296	0.0200931	5.98935e-07	CFB
rs11983782	7	22854176	G	C	-0.034973	0.00708792	8.04896e-07	CFB
rs145044051	7	150602395	C	T	-0.0436141	0.00853113	3.18178e-07	CFB
rs9987289	8	9325848	G	A	0.06953	0.0120697	8.37568e-09	CFB
rs28601761	8	125487789	G	C	0.0601797	0.00711719	2.77779e-17	CFB
rs58548898	1	109752931	T	C	-0.0820693	0.0150986	5.46248e-08	CHP1
rs10852265	16	24353318	A	C	-0.0540593	0.010297	1.52083e-07	CHP1
rs17602709	3	188352620	A	G	-0.0404981	0.00802371	4.48085e-07	CHP1
rs466382	4	188623004	A	G	0.0950454	0.0193519	9.0417e-07	CHP1
rs607929	6	32619221	G	C	-0.0437767	0.00781356	2.11091e-08	CHP1
rs56278466	10	17833858	G	T	0.0848634	0.00750751	1.25661e-29	CILP
rs8177382	11	126296573	A	C	-0.0608597	0.0108984	2.34682e-08	CILP
rs35887873	11	126349501	C	T	0.0757494	0.00846028	3.44271e-19	CILP
rs6489548	12	479438	G	A	-0.0798355	0.00728984	6.5283e-28	CILP
rs597808	12	111535554	G	A	0.0400163	0.00712229	1.92673e-08	CILP
rs10847242	12	122594473	G	T	0.0382578	0.00744635	2.77978e-07	CILP
rs11830055	12	124319119	C	T	-0.124413	0.0246988	4.72411e-07	CILP
rs11632195	15	65201150	T	C	-0.289281	0.00758389	1e-200	CILP
rs144129583	17	7532506	A	G	0.0878594	0.0152918	9.16431e-09	CILP
rs10422101	19	51816862	C	G	-0.0422126	0.0080499	1.57243e-07	CILP
rs1260326	2	27508073	C	T	0.042492	0.00730832	6.09284e-09	CILP
rs4434138	3	52522874	G	A	-0.0408009	0.00717461	1.29408e-08	CILP
rs4955784	3	168054292	T	C	0.0451472	0.00921099	9.51349e-07	CILP
rs9326982	5	115995421	C	T	0.0454828	0.00738052	7.15814e-10	CILP
rs56015760	6	166177382	T	C	0.047692	0.00956293	6.12689e-07	CILP
rs6694508	1	93376466	C	A	0.0407297	0.00732282	2.66661e-08	CNDP1
rs11042598	11	10045331	C	G	0.045108	0.0071352	2.58387e-10	CNDP1
rs2933243	12	56466793	A	G	-0.053047	0.00915277	6.80237e-09	CNDP1
rs28929474	14	94378610	T	C	-0.154519	0.024804	4.67692e-10	CNDP1
rs17580	14	94380925	A	T	-0.0846166	0.0162828	2.02857e-07	CNDP1
rs139974673	15	43735687	C	T	-0.214269	0.0229134	8.66363e-21	CNDP1
rs8091941	18	74369014	G	A	-0.0793021	0.0123095	1.17636e-10	CNDP1
rs17817077	18	74542308	A	G	0.294253	0.00760046	1e-200	CNDP1
rs58692747	18	74565502	C	T	-0.230526	0.0091219	6.53131e-141	CNDP1
rs148000502	18	74582442	C	T	0.183424	0.0202658	1.41775e-19	CNDP1
rs79898943	18	74812278	A	G	-0.137051	0.0279704	9.59091e-07	CNDP1
rs34465875	19	23622543	G	C	-0.350421	0.00899514	1e-200	CNDP1
rs11670440	19	24250424	G	C	-0.210083	0.0180877	3.47056e-31	CNDP1
rs538791634	19	24281548	C	G	0.183969	0.0230048	1.27526e-15	CNDP1
rs117105803	19	27991172	G	C	0.211121	0.0319648	3.98107e-11	CNDP1
rs1260326	2	27508073	C	T	-0.0366922	0.00724741	4.13143e-07	CNDP1
rs715	2	210678331	C	T	0.0430029	0.00771079	2.44726e-08	CNDP1
rs2294915	22	43945024	T	C	-0.0595385	0.0083663	1.10739e-12	CNDP1
rs11708895	3	58417315	C	T	0.0451084	0.00736305	8.99353e-10	CNDP1
rs645040	3	136207780	T	G	0.113492	0.00849383	1.01251e-40	CNDP1
rs9379084	6	7231610	A	G	0.0713045	0.0114452	4.66155e-10	CNDP1
rs1868361	7	17456045	T	C	-0.0462887	0.0090606	3.24235e-07	CNDP1
rs1030431	8	58399138	G	A	-0.0560636	0.00755887	1.19867e-13	CNDP1
rs28601761	8	125487789	G	C	-0.0492414	0.00723358	9.9426e-12	CNDP1
rs112675145	9	26729727	A	G	-0.0862192	0.0167206	2.51663e-07	CNDP1
rs74950823	1	46509366	T	C	-0.0762681	0.0141451	6.97365e-08	COL5A1
rs12409839	1	54381032	A	G	-0.0601568	0.0114903	1.64611e-07	COL5A1
rs11161767	1	86168526	G	A	0.0458838	0.00869041	1.29312e-07	COL5A1
rs2476601	1	113834946	G	A	0.0640167	0.0123047	1.9649e-07	COL5A1
rs114384494	1	161683764	T	C	0.104016	0.0199859	1.94527e-07	COL5A1
rs56278466	10	17833858	G	T	0.103007	0.00781024	1.01953e-39	COL5A1
rs508196	10	17974944	T	C	-0.045862	0.00753536	1.15587e-09	COL5A1
rs1757216	10	18217497	A	G	0.0539426	0.0105537	3.20059e-07	COL5A1
rs12358789	10	63361725	G	A	0.0576631	0.00761653	3.71022e-14	COL5A1
rs2509582	11	128737714	C	T	0.0729927	0.00850817	9.55873e-18	COL5A1
rs646210	11	128772493	T	C	-0.0582452	0.00920701	2.5131e-10	COL5A1
rs79755767	12	54304624	A	G	0.063695	0.0125162	3.59956e-07	COL5A1
rs2723889	12	103606692	C	T	0.0520338	0.00789945	4.48745e-11	COL5A1
rs3751198	12	103753429	G	A	0.0422899	0.00765126	3.25424e-08	COL5A1
rs112424884	12	132517684	A	G	-0.102453	0.0160867	1.90467e-10	COL5A1
rs9594738	13	42378009	T	C	0.088933	0.00741016	3.4898e-33	COL5A1
rs8005138	14	74961852	G	A	-0.0394968	0.00744823	1.14014e-07	COL5A1
rs734206	14	92642119	C	T	-0.0429513	0.00812366	1.24211e-07	COL5A1
rs17673793	16	75171315	G	A	-0.0395703	0.00802619	8.21637e-07	COL5A1
rs139351537	19	5786399	T	C	0.27538	0.0555296	7.08027e-07	COL5A1
rs892090	19	55027704	G	T	0.07177	0.00998999	6.76083e-13	COL5A1
rs3747207	22	43928975	A	G	0.0568223	0.00898735	2.57401e-10	COL5A1
rs56281646	3	58439190	A	G	0.0378729	0.00769011	8.44112e-07	COL5A1
rs9821691	3	72347751	T	G	0.0557704	0.00753257	1.32251e-13	COL5A1
rs1386625	4	38359499	G	A	-0.0750117	0.0126366	2.91938e-09	COL5A1
rs11750874	5	72394515	C	A	-0.0676649	0.0120568	1.99825e-08	COL5A1
rs114694170	5	88884379	C	T	0.115316	0.0157726	2.6485e-13	COL5A1
rs76760132	6	31430554	G	C	0.0616371	0.0103498	2.59424e-09	COL5A1
rs1832777	6	109326927	G	T	-0.039297	0.00751605	1.70978e-07	COL5A1
rs7743991	6	164039083	T	C	0.0365359	0.00743626	8.95963e-07	COL5A1
rs4541868	8	105578477	A	C	-0.0719738	0.00833995	6.13479e-18	COL5A1
rs11995824	8	119000461	G	C	0.0577032	0.00744657	9.26403e-15	COL5A1
rs60757417	9	132989049	G	C	-0.147615	0.0159346	1.97333e-20	COL5A1
rs2157770	9	134056342	G	A	0.0558972	0.00837208	2.44512e-11	COL5A1
rs3118555	9	134467198	G	A	0.16866	0.00838347	5.11329e-90	COL5A1
rs3118521	9	134552232	C	G	-0.0522747	0.0086151	1.29676e-09	COL5A1
rs12002679	9	134641788	G	C	0.236004	0.0085354	2.79254e-168	COL5A1
rs138033448	9	134787529	T	C	0.182948	0.0264902	4.97622e-12	COL5A1
rs78835473	1	225522833	A	G	-0.158877	0.0303166	1.60074e-07	CSTB
rs74729697	10	12659847	C	T	0.0511135	0.010344	7.758e-07	CSTB
rs7310615	12	111427245	G	C	-0.0418536	0.0064003	6.18016e-11	CSTB
rs146891480	14	48444308	A	G	-0.136235	0.0256683	1.11117e-07	CSTB
rs1296100	14	90518895	C	G	0.0338455	0.00687501	8.52433e-07	CSTB
rs117114409	18	10383547	T	C	0.177476	0.0356506	6.418e-07	CSTB
rs143470409	21	43389611	A	G	-0.208988	0.034917	2.16018e-09	CSTB
rs2276528	21	43732619	A	G	-0.438218	0.0106372	1e-200	CSTB
rs57785757	21	43772173	T	G	0.285262	0.0217568	2.8327e-39	CSTB
rs2838414	21	43832557	T	C	-0.237962	0.0118816	3.15355e-89	CSTB
rs111964977	21	44102714	G	C	-0.320504	0.0176829	2.0193e-73	CSTB
rs9983695	21	44291925	C	T	0.0743404	0.0120362	6.55858e-10	CSTB
rs80082351	3	114697079	G	A	-0.0657529	0.0132633	7.14036e-07	CSTB
rs62329741	4	104864123	C	A	0.0850802	0.0171029	6.53793e-07	CSTB
rs6468994	8	105284492	T	C	-0.0329876	0.00641247	2.68541e-07	CSTB
rs6993770	8	105569300	T	A	-0.044012	0.00707395	4.91802e-10	CSTB
rs12142402	1	205159087	T	A	0.0372064	0.00758424	9.30679e-07	CXCL3
rs7896518	10	63344740	G	A	0.0704363	0.00770495	6.14894e-20	CXCL3
rs11605332	11	267250	G	A	0.0546444	0.00874272	4.09742e-10	CXCL3
rs1362213	12	6173262	T	C	-0.0419312	0.00767203	4.617e-08	CXCL3
rs10774624	12	111395984	A	G	-0.0420899	0.00757262	2.72621e-08	CXCL3
rs1260326	2	27508073	C	T	-0.0401247	0.00772532	2.05906e-07	CXCL3
rs3804749	3	123114156	T	C	-0.044706	0.00776299	8.46857e-09	CXCL3
rs12640189	4	6891454	T	C	0.0676165	0.0100109	1.43582e-11	CXCL3
rs138393596	4	85418647	G	T	0.164238	0.0321807	3.33227e-07	CXCL3
rs77518304	5	86838675	G	C	0.077565	0.0156268	6.91974e-07	CXCL3
rs114694170	5	88884379	C	T	0.0937637	0.0159817	4.43956e-09	CXCL3
rs3104369	6	32634705	C	T	-0.101375	0.00900862	2.23666e-29	CXCL3
rs9275653	6	32718088	A	G	-0.03773	0.00770999	9.89829e-07	CXCL3
rs342298	7	106733200	T	C	-0.0389475	0.00757308	2.70558e-07	CXCL3
rs409801	9	4744743	C	T	0.0374208	0.00753517	6.82952e-07	CXCL3
rs12075	1	159205564	A	G	0.128513	0.00750653	1.04882e-65	CXCL8
rs7896518	10	63344740	G	A	0.0766672	0.00757548	4.48436e-24	CXCL8
rs11591571	10	102583047	A	G	0.0585118	0.00781177	6.87702e-14	CXCL8
rs1058935	11	308363	C	G	-0.0401675	0.00749842	8.4711e-08	CXCL8
rs174544	11	61800281	A	C	0.0427118	0.00798882	8.96995e-08	CXCL8
rs10876550	12	54318524	A	G	0.0379705	0.00744101	3.34557e-07	CXCL8
rs10145540	14	77491011	A	G	-0.0578256	0.00960854	1.76429e-09	CXCL8
rs59001897	15	64868193	A	T	0.0496	0.00984087	4.6504e-07	CXCL8
rs34645479	15	101167615	T	G	-0.0786881	0.0126812	5.46626e-10	CXCL8
rs12927351	16	74562720	A	C	-0.0533972	0.00929017	9.04586e-09	CXCL8
rs8047445	16	88394736	C	T	-0.0618868	0.0120358	2.71963e-07	CXCL8
rs2241244	17	39997301	C	G	0.0780518	0.00739329	4.70869e-26	CXCL8
rs1613662	19	55025227	A	G	0.102904	0.00998116	6.36209e-25	CXCL8
rs13013361	2	218082792	T	A	0.0603728	0.00750959	9.0261e-16	CXCL8
rs35941157	3	16953834	A	C	0.0394624	0.00803971	9.18058e-07	CXCL8
rs7618405	3	18209017	A	C	-0.0470778	0.00919737	3.07787e-07	CXCL8
rs1354034	3	56815721	C	T	-0.0396213	0.00753783	1.46967e-07	CXCL8
rs79656070	4	73725611	T	C	-0.172524	0.0167324	6.29796e-25	CXCL8
rs13138765	4	73746303	C	T	-0.0538504	0.00745207	4.96592e-13	CXCL8
rs10058246	5	100691555	G	T	0.0657551	0.0124467	1.27128e-07	CXCL8
rs116117737	6	28050575	T	G	-0.0992288	0.0195838	4.0439e-07	CXCL8
rs2281276	6	32372329	G	A	-0.0562119	0.00745386	4.65265e-14	CXCL8
rs7797025	7	100340318	G	A	-0.054889	0.00963564	1.22324e-08	CXCL8
rs4541868	8	105578477	A	C	-0.0612896	0.00832904	1.85909e-13	CXCL8
rs41270291	1	15667756	A	G	-0.264148	0.034661	2.51942e-14	DDI2
rs34315295	14	106005536	A	G	0.0855415	0.010368	1.57725e-16	DDI2
rs34901720	17	28852500	G	A	0.0451742	0.00919216	8.9043e-07	DDI2
rs2112362	5	115304992	A	C	0.0482669	0.00978789	8.16921e-07	DDI2
rs4867843	5	176655535	G	A	0.0521007	0.0106484	9.93963e-07	DDI2
rs11759553	6	135101158	T	A	-0.0496081	0.00820744	1.50076e-09	DDI2
rs2249123	1	182214309	G	A	0.0437992	0.00757385	7.34057e-09	DKK3
rs151151882	1	193614919	A	G	-0.204945	0.0383426	9.03733e-08	DKK3
rs10761731	10	63267850	T	A	0.0373162	0.00696804	8.54004e-08	DKK3
rs196255	10	119720649	T	C	-0.0654294	0.0069658	5.83445e-21	DKK3
rs7480000	11	11966760	C	G	0.143777	0.00739747	3.83354e-84	DKK3
rs6485388	11	12015609	C	T	0.23303	0.00747584	1e-200	DKK3
rs2137537	12	70719307	C	T	-0.0449538	0.00700213	1.36251e-10	DKK3
rs79387839	12	103302404	G	T	0.0524807	0.00949775	3.28375e-08	DKK3
rs11831074	12	103555569	A	G	-0.128034	0.0136117	5.14754e-21	DKK3
rs11111707	12	103663606	G	C	0.291407	0.0123838	1.95434e-122	DKK3
rs3751198	12	103753429	G	A	0.126516	0.00718056	1.75227e-69	DKK3
rs12817750	12	113181550	C	T	-0.0631278	0.0113509	2.67492e-08	DKK3
rs545119	15	43910847	C	A	-0.0882597	0.0173981	3.91706e-07	DKK3
rs766522	16	75390212	C	T	0.049164	0.00836193	4.11481e-09	DKK3
rs55714927	17	7176997	T	C	0.0532857	0.00865408	7.39963e-10	DKK3
rs2684641	17	45442752	G	A	0.0441066	0.00893642	7.99006e-07	DKK3
rs571497	19	7762944	A	G	0.0513885	0.00960948	8.90841e-08	DKK3
rs62123963	19	35050200	A	G	0.0635735	0.0114278	2.65118e-08	DKK3
rs17549173	19	35909329	A	G	0.0758762	0.0134071	1.51894e-08	DKK3
rs1047891	2	210675783	A	C	0.0421388	0.00741657	1.33352e-08	DKK3
rs738408	22	43928850	T	C	0.0438243	0.00826838	1.15654e-07	DKK3
rs13086758	3	24380618	A	T	-0.0422687	0.00841153	5.03188e-07	DKK3
rs419752	3	52395649	T	C	0.0773552	0.0156797	8.0783e-07	DKK3
rs73120898	3	63843104	A	G	-0.0508418	0.0101471	5.429e-07	DKK3
rs112880875	3	132487447	A	G	-0.0635703	0.0120723	1.39589e-07	DKK3
rs11733638	4	111192163	C	T	-0.033658	0.00687106	9.65628e-07	DKK3
rs9402685	6	135098550	C	T	-0.0416164	0.00782491	1.04655e-07	DKK3
rs2389858	7	17868507	A	T	-0.0654923	0.0068478	1.13292e-21	DKK3
rs75355100	7	26306213	A	C	-0.13094	0.0239262	4.43323e-08	DKK3
rs507666	9	133273983	A	G	-0.102601	0.00887808	6.82967e-31	DKK3
rs6427756	1	199031598	G	A	-0.0724719	0.00845014	9.78814e-18	DNM3
rs34397798	1	231984742	G	A	0.0484992	0.00888432	4.78906e-08	DNM3
rs7896518	10	63344740	G	A	0.0652831	0.00755512	5.57699e-18	DNM3
rs7971757	12	23947371	T	G	0.0434626	0.00871241	6.08219e-07	DNM3
rs978274	15	57236302	T	C	0.0375596	0.00737201	3.48939e-07	DNM3
rs2322098	18	5458244	G	C	-0.0718994	0.00771558	1.17733e-20	DNM3
rs62077750	18	5564132	A	G	0.0476978	0.00934489	3.32254e-07	DNM3
rs35962870	18	5636158	T	G	0.0513407	0.00758708	1.31613e-11	DNM3
rs9951754	18	5697094	T	C	-0.262707	0.0083445	1e-200	DNM3
rs2945989	19	36412360	A	G	0.0467157	0.00883472	1.23837e-07	DNM3
rs10411468	19	57279444	C	T	0.047251	0.00741565	1.86827e-10	DNM3
rs715	2	210678331	C	T	-0.0425549	0.00804893	1.2432e-07	DNM3
rs13062095	3	101548541	C	T	-0.0531329	0.0078416	1.23737e-11	DNM3
rs3792386	3	123134833	A	G	-0.0395188	0.00760067	1.99954e-07	DNM3
rs72795121	5	132302631	A	T	-0.041252	0.0074401	2.94713e-08	DNM3
rs707388	7	74794117	A	T	0.0746312	0.0103083	4.48849e-13	DNM3
rs342296	7	106732457	A	G	-0.140333	0.00740675	4.7076e-80	DNM3
rs12216772	8	105561691	T	C	0.0417251	0.00742389	1.90529e-08	DNM3
rs409801	9	4744743	C	T	0.0436141	0.00737874	3.40494e-09	DNM3
rs12342201	9	93132682	A	G	-0.0407566	0.00742055	3.96515e-08	DNM3
rs369352429	1	223712889	A	G	-0.211633	0.040034	1.24787e-07	DNMBP
rs7069556	10	100010620	G	C	-0.210681	0.0140854	1.3938e-50	DNMBP
rs11190375	10	100037190	A	G	0.0451265	0.00755724	2.35375e-09	DNMBP
rs192603052	10	100430581	C	T	-0.286857	0.0330175	3.68723e-18	DNMBP
rs10876550	12	54318524	A	G	0.0543768	0.00746152	3.15428e-13	DNMBP
rs115394012	2	176001107	A	C	-0.132459	0.025149	1.38695e-07	DNMBP
rs79634658	20	56791772	T	C	-0.163486	0.0309332	1.25617e-07	DNMBP
rs1354034	3	56815721	C	T	0.0505829	0.00754877	2.07253e-11	DNMBP
rs12187267	5	16490943	G	A	-0.0420742	0.00779684	6.80252e-08	DNMBP
rs114694170	5	88884379	C	T	0.123503	0.0157673	4.7698e-15	DNMBP
rs28040	5	96682362	G	C	-0.0504935	0.00912139	3.09949e-08	DNMBP
rs274555	5	132387259	T	C	0.0375122	0.00764057	9.12599e-07	DNMBP
rs55644416	6	425644	G	T	0.100494	0.0205267	9.79152e-07	DNMBP
rs191514719	6	34372432	C	T	-0.111411	0.0225439	7.73482e-07	DNMBP
rs342293	7	106731773	G	C	-0.0374348	0.00741057	4.38268e-07	DNMBP
rs6993770	8	105569300	T	A	-0.0472899	0.00818631	7.61798e-09	DNMBP
rs692502	9	4745645	A	G	0.0402308	0.00753677	9.40091e-08	DNMBP
rs242922	17	45869004	C	A	-0.0412275	0.00796997	2.30542e-07	DTX2
rs115452662	2	88494682	T	A	-0.171439	0.0348883	8.92648e-07	DTX2
rs7825672	8	88338845	A	T	-0.0489233	0.00981027	6.13409e-07	DTX2
rs646776	1	109275908	T	C	0.0520376	0.00887232	4.48704e-09	DUSP13
rs2395137	10	75088235	C	G	-0.264065	0.00764983	1e-200	DUSP13
rs114429999	10	75419042	C	T	0.190101	0.0358751	1.16464e-07	DUSP13
rs964184	11	116778201	C	G	-0.072224	0.0108827	3.2107e-11	DUSP13
rs11171739	12	56076841	T	C	-0.040416	0.00744765	5.7413e-08	DUSP13
rs112502880	17	69138665	C	T	0.088483	0.0177318	6.03545e-07	DUSP13
rs445925	19	44912383	A	G	0.058719	0.0118351	6.99794e-07	DUSP13
rs6035149	20	18886243	A	G	-0.121323	0.0230742	1.4566e-07	DUSP13
rs13047000	21	28675997	G	A	0.0390542	0.00768915	3.79175e-07	DUSP13
rs7648352	3	30736452	G	A	0.0376035	0.00764935	8.8371e-07	DUSP13
rs1265911	6	31932793	G	A	0.0760709	0.0142132	8.69221e-08	DUSP13
rs12123922	1	205171308	A	G	0.0429245	0.007273	3.59344e-09	DXO
rs10733789	10	63188924	C	T	0.0411154	0.00784121	1.57561e-07	DXO
rs35979828	12	54292096	T	C	-0.0931734	0.014307	7.39435e-11	DXO
rs10774624	12	111395984	A	G	-0.0398107	0.00726864	4.32484e-08	DXO
rs35421305	17	30044570	A	G	0.0794739	0.0153408	2.21238e-07	DXO
rs892090	19	55027704	G	T	0.0517021	0.00978083	1.24977e-07	DXO
rs1354034	3	56815721	C	T	0.0448159	0.00736982	1.19429e-09	DXO
rs144313884	3	118045827	A	G	-0.141259	0.0274492	2.65821e-07	DXO
rs60382956	3	160604339	C	T	-0.0683584	0.0129774	1.38287e-07	DXO
rs11950562	5	132316836	C	A	-0.0392199	0.00726198	6.63743e-08	DXO
rs114164395	6	31274552	G	A	-0.522722	0.0337472	4.09543e-54	DXO
rs150043706	6	31610688	A	G	-0.887202	0.0255609	1e-200	DXO
rs2071286	6	32212119	T	C	0.0678747	0.00977917	3.90032e-12	DXO
rs28362679	6	32396116	A	G	0.272519	0.0423541	1.24054e-10	DXO
rs6961069	7	80589645	T	C	0.0390735	0.0074002	1.2914e-07	DXO
rs342298	7	106733200	T	C	-0.0531575	0.00726701	2.57573e-13	DXO
rs6993770	8	105569300	T	A	-0.0682208	0.00799434	1.41808e-17	DXO
rs4736268	8	138863131	T	C	0.0438575	0.00850747	2.5339e-07	DXO
rs1756875	9	4770942	T	C	0.0368449	0.00736443	5.64196e-07	DXO
rs1497406	1	16178825	G	A	0.0474698	0.00692852	7.31476e-12	ECHDC3
rs3811468	1	81798632	G	T	-0.0386225	0.00782588	8.00553e-07	ECHDC3
rs4361977	1	155103603	T	C	-0.0372314	0.00693156	7.81772e-08	ECHDC3
rs78003115	1	155307413	A	G	-0.0535568	0.010927	9.52007e-07	ECHDC3
rs7920721	10	11678309	G	A	0.0790947	0.00779811	3.56697e-24	ECHDC3
rs11257269	10	11709377	A	G	-0.266392	0.0086693	1e-200	ECHDC3
rs7923065	10	11728172	T	G	-0.275433	0.00768698	1e-200	ECHDC3
rs72775910	10	11867402	T	C	-0.194739	0.0104089	4.19469e-78	ECHDC3
rs151068477	10	50882756	T	G	0.231367	0.0439243	1.3836e-07	ECHDC3
rs2511241	11	73234296	T	C	-0.0732831	0.0134184	4.72455e-08	ECHDC3
rs76372617	16	80461951	A	T	0.0474039	0.00867548	4.65179e-08	ECHDC3
rs17138478	17	37713312	A	C	-0.0527504	0.0101805	2.20075e-07	ECHDC3
rs12373325	18	58420416	C	T	-0.085988	0.00856375	1.00716e-23	ECHDC3
rs73001065	19	19349732	C	G	0.0671184	0.0134529	6.06485e-07	ECHDC3
rs1260326	2	27508073	C	T	-0.0513695	0.00703983	2.94307e-13	ECHDC3
rs7579905	2	198003385	A	T	-0.0459182	0.00865229	1.11406e-07	ECHDC3
rs738409	22	43928847	G	C	0.0524275	0.00830248	2.70707e-10	ECHDC3
rs4835265	4	145900258	A	C	0.115551	0.00944271	1.97197e-34	ECHDC3
rs13162806	5	31058519	A	G	-0.0398316	0.00724046	3.77112e-08	ECHDC3
rs17258904	6	21927900	G	A	-0.0439609	0.00766643	9.79693e-09	ECHDC3
rs7041363	9	114383763	G	C	-0.0407306	0.00694274	4.44703e-09	ECHDC3
rs72686460	1	45402081	A	T	0.0359384	0.00695072	2.33523e-07	EDA2R
rs115463006	1	92116055	T	C	-0.171492	0.0320767	8.97677e-08	EDA2R
rs4252694	1	204529928	G	A	-0.0403478	0.00630277	1.53755e-10	EDA2R
rs10905234	10	5818319	T	A	0.0314285	0.00602256	1.80414e-07	EDA2R
rs35007589	10	103895470	T	C	-0.0555097	0.00995326	2.44647e-08	EDA2R
rs479844	11	65784486	G	A	0.0298662	0.00592165	4.56951e-07	EDA2R
rs11512450	11	108446283	G	A	0.0532011	0.00817056	7.44903e-11	EDA2R
rs2732439	12	48350416	A	C	0.0377805	0.00590108	1.53045e-10	EDA2R
rs1337298	13	73556538	T	C	-0.0361955	0.00594658	1.15202e-09	EDA2R
rs36060036	16	20350628	T	C	-0.0463104	0.00791864	4.96684e-09	EDA2R
rs10852605	16	50037319	A	G	-0.0403546	0.00729616	3.1853e-08	EDA2R
rs7200764	16	69514885	C	T	-0.0450905	0.00839454	7.81232e-08	EDA2R
rs78378222	17	7668434	G	T	-0.259828	0.026767	2.81384e-22	EDA2R
rs8105767	19	22032639	G	A	-0.0345446	0.0064841	9.95268e-08	EDA2R
rs13071005	3	34978458	G	T	-0.0361645	0.00608312	2.76357e-09	EDA2R
rs78863838	3	41804105	G	C	-0.0435764	0.00836132	1.87154e-07	EDA2R
rs1920120	3	169784392	C	T	0.0372386	0.00668108	2.49333e-08	EDA2R
rs10023335	4	76437834	C	T	0.0311433	0.00595529	1.69942e-07	EDA2R
rs7439869	4	94252628	C	T	-0.0347365	0.00595095	5.31056e-09	EDA2R
rs10069690	5	1279675	T	C	-0.0500598	0.00671084	8.6816e-14	EDA2R
rs2844805	6	29972902	A	G	0.0325579	0.00628494	2.21524e-07	EDA2R
rs34007282	8	23556634	G	A	-0.0395552	0.00719727	3.88803e-08	EDA2R
rs2800283	9	100575523	T	C	-0.0309278	0.00600184	2.56277e-07	EDA2R
rs2845705	11	120230383	T	A	0.185716	0.00961169	3.51803e-83	EFNB2
rs72632699	13	106639185	T	C	0.0545548	0.0108921	5.4805e-07	EFNB2
rs9341767	6	79292733	T	C	-0.0424597	0.00825819	2.72502e-07	EFNB2
rs2350865	7	9552606	T	C	0.0449063	0.00902564	6.51073e-07	EFNB2
rs532436	9	133274414	A	G	-0.0767897	0.00995778	1.24337e-14	EFNB2
rs1473496	1	8329991	A	G	-0.0387874	0.00736549	1.39354e-07	ELOA
rs35863927	1	23725444	C	T	0.0861558	0.0075528	3.85212e-30	ELOA
rs145350348	1	169030670	C	T	0.197847	0.0397183	6.31684e-07	ELOA
rs7080536	10	113588287	A	G	-0.122335	0.0182224	1.90108e-11	ELOA
rs597808	12	111535554	G	A	-0.0487322	0.00730338	2.5142e-11	ELOA
rs2503342	13	22254573	C	T	-0.0680868	0.0132494	2.76389e-07	ELOA
rs10418046	19	53824615	G	T	0.143052	0.00898866	5.00495e-57	ELOA
rs4954585	2	136240824	T	C	0.0454175	0.00844894	7.63607e-08	ELOA
rs1354034	3	56815721	C	T	0.0409089	0.00745274	4.03971e-08	ELOA
rs2903918	4	83236290	G	C	-0.0388538	0.00772981	4.99528e-07	ELOA
rs145096218	4	95363377	A	C	0.194732	0.0387173	4.91541e-07	ELOA
rs4339550	7	150590120	T	A	-0.0451587	0.00888114	3.68036e-07	ELOA
rs7827200	8	54565712	C	T	0.0638983	0.01285	6.60557e-07	ELOA
rs9787076	1	43675478	C	A	0.0635982	0.00760167	5.94429e-17	ERBB4
rs333947	1	109928142	A	G	-0.0503296	0.0100121	4.98574e-07	ERBB4
rs35383942	1	201468704	T	C	0.127275	0.0148659	1.11353e-17	ERBB4
rs56278466	10	17833858	G	T	0.109838	0.00751678	2.34207e-48	ERBB4
rs10740059	10	62049768	A	G	-0.0399186	0.00729836	4.51222e-08	ERBB4
rs6586028	10	80494228	T	C	-0.0439228	0.00880415	6.07337e-07	ERBB4
rs55895126	11	2926673	A	T	0.0370197	0.00720811	2.80886e-07	ERBB4
rs4414209	11	3864281	G	T	-0.0387986	0.00782923	7.21058e-07	ERBB4
rs11227279	11	65727740	A	G	-0.0511863	0.00750434	9.0469e-12	ERBB4
rs11220465	11	126387884	A	G	-0.0642809	0.00989094	8.08723e-11	ERBB4
rs11830324	12	510452	A	T	-0.0776597	0.00953386	3.77225e-16	ERBB4
rs11065979	12	111621753	T	C	-0.040573	0.00715542	1.4259e-08	ERBB4
rs9567991	13	48080390	T	C	0.0518046	0.00745922	3.78355e-12	ERBB4
rs2541593	16	53423	A	C	0.0676194	0.00910756	1.13188e-13	ERBB4
rs9928757	16	20341541	C	G	-0.0540635	0.0088975	1.23021e-09	ERBB4
rs12445401	16	72114520	G	A	-0.0771673	0.00915142	3.39e-17	ERBB4
rs56093546	17	7160496	A	T	0.100323	0.00895111	3.72992e-29	ERBB4
rs5412	17	7280727	A	G	-0.0526816	0.00962113	4.35983e-08	ERBB4
rs72835417	17	49164280	A	G	0.151664	0.0113896	1.86853e-40	ERBB4
rs117315138	17	49177254	G	A	0.15964	0.021545	1.26707e-13	ERBB4
rs117753190	17	69140184	G	C	0.0992433	0.0192191	2.41991e-07	ERBB4
rs1426878	18	27179602	A	G	0.0476653	0.00783727	1.18785e-09	ERBB4
rs708686	19	5840608	T	C	0.0407189	0.00805655	4.32335e-07	ERBB4
rs485186	19	48703949	G	A	0.0973055	0.00718774	9.36699e-42	ERBB4
rs12692385	2	9554491	T	C	0.0823586	0.00776302	2.70396e-26	ERBB4
rs4665972	2	27375230	C	T	0.0642618	0.00750742	1.13084e-17	ERBB4
rs199961979	2	95596753	T	C	0.0378926	0.00755735	5.33077e-07	ERBB4
rs72831810	2	113221787	A	G	0.0516932	0.010075	2.8843e-07	ERBB4
rs707274	2	211076715	T	A	0.101839	0.00791645	7.15814e-38	ERBB4
rs1469927	2	211129226	T	A	-0.0462398	0.00736012	3.33204e-10	ERBB4
rs2030460	2	211615130	A	T	0.19989	0.0116695	8.97842e-66	ERBB4
rs4423551	2	212107681	A	T	0.0724732	0.00740872	1.34338e-22	ERBB4
rs6735267	2	212539139	T	C	0.21909	0.00830685	2.68534e-153	ERBB4
rs4228	3	58427942	T	G	0.0376082	0.00741958	4.00359e-07	ERBB4
rs140620086	3	98857467	T	C	-0.109432	0.0175972	5.01176e-10	ERBB4
rs9870122	3	136101423	G	T	0.0426575	0.00801276	1.01681e-07	ERBB4
rs1468906	3	186930328	G	A	-0.0657598	0.00746655	1.28233e-18	ERBB4
rs547380175	4	26288848	T	A	0.097465	0.0176569	3.39102e-08	ERBB4
rs138771437	4	105485372	A	G	0.116969	0.0237765	8.67541e-07	ERBB4
rs1391373	6	32635883	C	T	0.0540264	0.00744418	3.94185e-13	ERBB4
rs34673027	7	129098971	A	C	-0.0758573	0.00718736	4.854e-26	ERBB4
rs9987289	8	9325848	G	A	-0.0714648	0.0122998	6.23835e-09	ERBB4
rs12544261	8	141226339	A	C	-0.0383537	0.00751576	3.34118e-07	ERBB4
rs10973267	9	3734162	A	G	-0.0387967	0.00715489	5.88004e-08	ERBB4
rs2519093	9	133266456	T	C	-0.135716	0.00923678	7.14496e-49	ERBB4
rs41307428	9	133471682	T	C	0.140841	0.0280436	5.10787e-07	ERBB4
rs699236	1	67575748	T	A	0.0443199	0.00888519	6.09874e-07	FST
rs56205943	12	57285631	A	G	0.0498604	0.00854605	5.40082e-09	FST
rs12882639	14	100339640	C	T	0.0395634	0.00737263	8.03859e-08	FST
rs139974673	15	43735687	C	T	0.178234	0.0238363	7.57879e-14	FST
rs1260326	2	27508073	C	T	-0.109935	0.00756267	7.11214e-48	FST
rs17050272	2	120548864	A	G	0.0380854	0.00749224	3.70903e-07	FST
rs10164853	2	157625480	G	A	0.0724884	0.0139479	2.02437e-07	FST
rs9292022	5	53492894	A	T	0.0629259	0.00743991	2.7227e-17	FST
rs31226	5	54031741	C	T	-0.141806	0.00761229	1.88712e-77	FST
rs2112353	5	165800230	A	C	-0.103874	0.0194984	9.96782e-08	FST
rs74352158	6	86216060	A	G	-0.167735	0.0335331	5.67166e-07	FST
rs35173225	7	73586691	T	C	-0.0728704	0.0112337	8.77001e-11	FST
rs117959699	16	4970842	C	G	0.060856	0.0120872	4.78443e-07	GABRA4
rs116092690	3	135141490	C	T	0.131905	0.0262208	4.8908e-07	GABRA4
rs10504320	8	61015554	A	G	0.12753	0.0254808	5.58805e-07	GABRA4
rs112240506	10	24257263	A	G	0.234969	0.0459619	3.18346e-07	GAS2
rs2279240	11	22675344	C	T	0.11438	0.00843309	6.61912e-42	GAS2
rs61889475	11	22833243	G	T	-0.0402803	0.00787495	3.13762e-07	GAS2
rs4883973	13	74516284	G	T	-0.0479751	0.00941601	3.48642e-07	GAS2
rs9604511	13	113924286	T	G	-0.04965	0.00828991	2.10868e-09	GAS2
rs738409	22	43928847	G	C	0.0543045	0.00925393	4.40393e-09	GAS2
rs924204	1	16187431	G	A	0.0642168	0.00692082	1.71435e-20	GGT1
rs10796939	1	155116319	T	C	-0.0384747	0.00703719	4.56867e-08	GGT1
rs151068477	10	50882756	T	G	0.222863	0.0398607	2.2573e-08	GGT1
rs2298608	11	58636994	T	C	-0.051187	0.00797994	1.41325e-10	GGT1
rs4084164	11	62433986	G	A	-0.0416657	0.00710465	4.50308e-09	GGT1
rs7970695	12	120985573	A	G	0.131914	0.0070591	6.30957e-78	GGT1
rs146465867	14	88878701	T	A	0.111919	0.022807	9.23719e-07	GGT1
rs151184170	14	103103795	T	C	0.0761493	0.0079421	8.97635e-22	GGT1
rs339969	15	60591082	A	C	0.0442381	0.00700144	2.64229e-10	GGT1
rs56391383	16	30527098	A	G	0.0366416	0.00692919	1.23652e-07	GGT1
rs12946859	17	79331700	T	C	0.0383974	0.00756879	3.91336e-07	GGT1
rs4998040	18	58426767	A	G	-0.0608715	0.00835639	3.22998e-13	GGT1
rs123698	19	807442	C	G	0.0352464	0.00695354	4.0023e-07	GGT1
rs8112983	19	48726268	C	T	0.0460825	0.0068488	1.71356e-11	GGT1
rs4665972	2	27375230	C	T	-0.0478171	0.00701306	9.21298e-12	GGT1
rs5751901	22	24596299	C	T	0.236445	0.00730652	1e-200	GGT1
rs4685807	3	4736163	G	A	0.0455185	0.00915067	6.54712e-07	GGT1
rs4835265	4	145900258	A	C	0.0899797	0.00936921	7.70726e-22	GGT1
rs147065644	6	65192886	C	T	-0.108363	0.0220447	8.85156e-07	GGT1
rs7784668	7	73631153	C	T	-0.0608232	0.0101558	2.1113e-09	GGT1
rs139308773	7	154859413	G	A	0.139976	0.0282967	7.54727e-07	GGT1
rs760077	1	155208991	T	A	-0.0527644	0.00788396	2.1918e-11	GKN1
rs71469854	11	1193912	T	C	0.0879607	0.0100721	2.47856e-18	GKN1
rs71482032	11	29569867	C	T	-0.0724593	0.0144513	5.32954e-07	GKN1
rs4072925	16	79402649	A	C	-0.0461135	0.00765932	1.73804e-09	GKN1
rs601338	19	48703417	A	G	-0.0863834	0.00771866	4.48849e-29	GKN1
rs4816636	21	39654583	G	T	0.064188	0.00885668	4.24815e-13	GKN1
rs6776539	3	134269189	T	C	-0.043487	0.00875457	6.78735e-07	GKN1
rs3767506	1	201073025	T	C	0.0942831	0.018081	1.8434e-07	GLYR1
rs7080536	10	113588287	A	G	-0.228801	0.0188059	4.69137e-34	GLYR1
rs9267575	6	31844073	C	T	-0.0403362	0.00778257	2.18479e-07	GLYR1
rs414335	6	148563100	C	T	-0.0478338	0.00914745	1.70247e-07	GLYR1
rs2803321	1	1936077	T	C	0.0372058	0.00710397	1.62926e-07	GPC1
rs4642942	1	31019303	G	C	-0.0364571	0.00717463	3.74671e-07	GPC1
rs1535701	1	93339644	G	T	0.078648	0.00724031	1.7386e-27	GPC1
rs333947	1	109928142	A	G	-0.0631034	0.00986382	1.57979e-10	GPC1
rs12758626	1	117549545	G	A	-0.0497599	0.00737685	1.52581e-11	GPC1
rs150816167	1	179602727	C	T	0.125169	0.0177835	1.94357e-12	GPC1
rs7550158	1	230193507	A	G	0.0401835	0.00802409	5.50377e-07	GPC1
rs2273967	1	230279547	T	C	0.0719344	0.00813724	9.55873e-19	GPC1
rs56278466	10	17833858	G	T	0.0615249	0.00738537	8.04081e-17	GPC1
rs174576	11	61836038	A	C	0.0453404	0.00731292	5.64456e-10	GPC1
rs7971751	12	56084874	C	A	-0.0516774	0.00708156	2.93224e-13	GPC1
rs2860482	12	56712154	C	A	0.0402533	0.00780408	2.49632e-07	GPC1
rs3184504	12	111446804	C	T	0.0439603	0.00697887	2.99475e-10	GPC1
rs73219860	12	122141208	G	A	0.0469132	0.00878938	9.4241e-08	GPC1
rs78083828	12	132858948	T	C	-0.0629394	0.0125927	5.79069e-07	GPC1
rs9318186	13	73532802	G	A	-0.0521018	0.00712691	2.66011e-13	GPC1
rs17197114	14	21426367	C	T	0.0469418	0.00923273	3.6902e-07	GPC1
rs7147722	14	49645994	T	G	0.103345	0.00706277	1.74743e-48	GPC1
rs3742366	14	103732014	C	T	0.0370137	0.00740052	5.68853e-07	GPC1
rs34262842	16	20344489	G	A	-0.0568936	0.00946159	1.81991e-09	GPC1
rs2292318	16	67951803	T	C	0.055479	0.010716	2.25222e-07	GPC1
rs3785029	16	84114744	T	C	-0.036488	0.00740383	8.29679e-07	GPC1
rs189524376	17	7265636	T	C	0.0981839	0.0188354	1.8608e-07	GPC1
rs2746024	17	18260834	T	G	-0.0411784	0.0077206	9.62964e-08	GPC1
rs12453279	17	46910425	T	G	-0.0409069	0.0072535	1.70435e-08	GPC1
rs1801689	17	66214462	C	A	0.191451	0.0205166	1.044e-20	GPC1
rs73597479	19	35054481	T	C	0.106044	0.0182743	6.51808e-09	GPC1
rs4665972	2	27375230	C	T	0.0454398	0.00743647	9.93802e-10	GPC1
rs11678798	2	38506635	A	C	0.0414607	0.00827766	5.47848e-07	GPC1
rs71414736	2	127104369	G	C	-0.191649	0.0249336	1.51356e-14	GPC1
rs6431290	2	234753994	G	A	-0.145505	0.0296507	9.23336e-07	GPC1
rs184092984	2	240332976	C	A	0.233602	0.0266651	1.94267e-18	GPC1
rs71428434	2	240347698	G	A	0.127032	0.0182077	3.01926e-12	GPC1
rs35479259	2	240449129	T	C	0.316814	0.00964663	1e-200	GPC1
rs11892190	2	240454345	G	A	0.163813	0.00826747	2.24698e-87	GPC1
rs77541618	20	45296827	G	A	-0.0470096	0.00921614	3.38244e-07	GPC1
rs4812975	20	45916821	A	G	-0.0512176	0.00803285	1.81757e-10	GPC1
rs5763646	22	29963421	C	T	0.0577745	0.00715605	6.82967e-16	GPC1
rs1491306	4	44678340	G	C	0.0364828	0.00736256	7.22637e-07	GPC1
rs223485	4	102764018	A	T	-0.0470316	0.00703798	2.34801e-11	GPC1
rs3796500	4	128285828	C	T	-0.0613971	0.00880474	3.09813e-12	GPC1
rs3965330	5	177622441	A	G	0.189142	0.00711518	1.07152e-155	GPC1
rs114525652	5	177753905	A	G	-0.0834557	0.0139139	1.99738e-09	GPC1
rs147352305	6	116851038	T	C	0.166302	0.0323931	2.83818e-07	GPC1
rs4841132	8	9326086	G	A	-0.073039	0.0121782	2.00355e-09	GPC1
rs12542708	8	23422081	G	A	0.0843216	0.0149419	1.66825e-08	GPC1
rs4633028	8	39052342	G	A	-0.0823522	0.00833624	5.14399e-23	GPC1
rs2625445	8	60627769	A	G	-0.0736918	0.00818833	2.26517e-19	GPC1
rs7835610	8	90696825	T	C	-0.0552262	0.00699128	2.80479e-15	GPC1
rs10738909	9	33148836	C	T	0.0776048	0.00713336	1.44911e-27	GPC1
rs35086329	1	185320606	G	A	0.053953	0.00953716	1.53922e-08	GZMH
rs10732976	1	185439929	A	G	-0.0867057	0.00801967	3.03249e-27	GZMH
rs78325861	10	70618733	G	C	0.159196	0.0183152	3.56123e-18	GZMH
rs576785	11	128183379	C	T	-0.107969	0.00807719	9.41456e-41	GZMH
rs3819826	11	128780271	T	G	-0.0651949	0.0133126	9.72008e-07	GZMH
rs78498296	14	24590959	A	G	0.130944	0.0265519	8.15399e-07	GZMH
rs74458263	14	24606995	T	A	-0.158336	0.0204098	8.63774e-15	GZMH
rs190749747	14	24607097	G	C	-0.896529	0.0366367	3.01995e-132	GZMH
rs12147096	14	24669093	C	G	0.198934	0.013859	1.00323e-46	GZMH
rs899738	16	88556979	C	T	-0.0657338	0.0108744	1.49582e-09	GZMH
rs56133626	19	16331162	A	G	-0.0531347	0.00787902	1.54277e-11	GZMH
rs7507739	19	54864779	G	T	-0.0386978	0.00763161	3.96305e-07	GZMH
rs3732378	3	39265671	A	G	0.0630952	0.00968373	7.24102e-11	GZMH
rs73069104	3	47239243	C	T	0.0409221	0.00762334	7.96123e-08	GZMH
rs10477741	5	132459618	G	T	-0.0642098	0.0111097	7.48652e-09	GZMH
rs2524080	6	31274312	T	A	0.123323	0.00789262	4.9136e-55	GZMH
rs2347784	7	6485212	G	C	-0.0625233	0.00828599	4.49987e-14	GZMH
rs10111413	8	71979513	A	G	-0.0541329	0.00873267	5.6863e-10	GZMH
rs10962668	9	16894142	C	T	-0.038239	0.00758304	4.58997e-07	GZMH
rs6476398	9	33119243	T	C	-0.0511817	0.00798311	1.44331e-10	GZMH
rs190627972	14	105895518	C	T	0.14716	0.0110175	1.07895e-40	HADH
rs150188717	15	89082305	T	G	0.203118	0.0398824	3.5259e-07	HADH
rs9469112	6	32447376	T	C	-0.0614965	0.0101294	1.2706e-09	HADH
rs7152340	14	87409340	G	A	0.111815	0.0225518	7.11771e-07	HCG22
rs372055	22	18913237	A	G	-0.0499876	0.00952784	1.55039e-07	HCG22
rs27580	5	50866900	A	G	-0.0428596	0.00870714	8.55106e-07	HCG22
rs139585846	6	29881442	T	G	0.108769	0.0216896	5.30897e-07	HCG22
rs12110470	6	31030039	T	G	0.326323	0.0105087	1e-200	HCG22
rs139820499	6	31067097	C	G	0.348221	0.0115753	8.07235e-199	HCG22
rs9267088	6	31443436	A	T	0.148493	0.0112707	1.21927e-39	HCG22
rs35520555	6	32998925	G	A	-0.108556	0.0122692	8.92278e-19	HCG22
rs2519093	9	133266456	T	C	-0.0820117	0.00964516	1.84927e-17	HCG22
rs12450885	17	12120227	G	A	0.0442582	0.00867047	3.31711e-07	IL3
rs142196914	18	75139349	T	A	0.194952	0.0394057	7.52489e-07	IL3
rs6997031	8	29543968	C	A	0.121311	0.0225569	7.53078e-08	IL3
rs12133641	1	154455807	G	A	0.207532	0.00757823	4.10204e-165	IL6
rs12895462	14	77149098	C	T	-0.0467554	0.00939116	6.40236e-07	IL6
rs1136703	16	28595911	G	A	0.0414089	0.00763778	5.90731e-08	IL6
rs9746247	16	69922057	G	C	0.0370337	0.00756411	9.78228e-07	IL6
rs55709272	2	113109711	C	T	0.0477452	0.00742373	1.2641e-10	IL6
rs9977672	21	39091357	A	G	-0.0427829	0.00850975	4.9689e-07	IL6
rs115153905	6	31490975	A	G	0.0787415	0.0140156	1.9301e-08	IL6
rs2894379	6	32613134	C	T	0.0637503	0.00841607	3.59584e-14	IL6
rs145044051	7	150602395	C	T	-0.0449417	0.00903106	6.47963e-07	IL6
rs7526446	1	62702313	A	C	0.0425019	0.00672432	2.60507e-10	ITGA2
rs61823192	1	219121228	T	C	0.101947	0.0196957	2.26579e-07	ITGA2
rs12245149	10	63561387	A	C	-0.0489522	0.00636551	1.46893e-14	ITGA2
rs10793129	11	75748820	A	G	-0.0573731	0.0113878	4.70121e-07	ITGA2
rs6589572	11	116810847	A	G	-0.142302	0.00972058	1.57761e-48	ITGA2
rs61941923	12	106470228	A	C	-0.124301	0.024391	3.46617e-07	ITGA2
rs73548063	13	97660566	G	C	-0.154456	0.0291604	1.17856e-07	ITGA2
rs17580	14	94380925	A	T	0.262928	0.0147804	8.61192e-71	ITGA2
rs4906229	14	102591174	C	A	0.0437345	0.00741917	3.75137e-09	ITGA2
rs7162615	15	60802099	A	G	-0.03673	0.0070832	2.15417e-07	ITGA2
rs2027993	17	28379927	T	G	-0.0354038	0.00642075	3.50833e-08	ITGA2
rs438811	19	44913484	T	C	0.0913177	0.00755431	1.21983e-33	ITGA2
rs2868346	20	45919331	T	C	-0.0928541	0.00744803	1.1311e-35	ITGA2
rs1535044	20	46110517	A	G	0.0408452	0.00697568	4.75938e-09	ITGA2
rs1354034	3	56815721	C	T	0.0467756	0.00651831	7.17629e-13	ITGA2
rs1871184	5	52938493	T	C	0.482837	0.0105986	1e-200	ITGA2
rs3212670	5	53044013	A	G	-0.350344	0.014483	2.83792e-129	ITGA2
rs574051666	5	53146921	C	T	0.56789	0.0314094	4.56037e-73	ITGA2
rs1363969	5	53475687	A	G	-0.0803289	0.00754936	1.93108e-26	ITGA2
rs79299925	5	53819629	A	G	0.165676	0.0180127	3.65595e-20	ITGA2
rs116329305	5	53833459	A	G	-0.171011	0.0247281	4.65693e-12	ITGA2
rs6450174	5	53964440	A	T	0.0860284	0.0150045	9.83626e-09	ITGA2
rs61738275	6	31412421	T	C	0.0487611	0.00892443	4.66112e-08	ITGA2
rs6993770	8	105569300	T	A	-0.0421526	0.00707121	2.50449e-09	ITGA2
rs41273215	1	156912167	T	C	0.0642017	0.0128045	5.33138e-07	ITPR1
rs7080386	10	63288546	A	C	0.0766034	0.0077358	4.06163e-23	ITPR1
rs61869602	10	102518549	C	T	0.038434	0.00776873	7.5261e-07	ITPR1
rs61978213	14	70187041	A	G	0.0986128	0.0189992	2.09884e-07	ITPR1
rs111346520	15	60238740	T	G	0.115268	0.0234962	9.30315e-07	ITPR1
rs7176003	15	101443122	A	G	0.0508593	0.00787412	1.05361e-10	ITPR1
rs7172696	15	101451106	G	A	-0.123545	0.00846645	3.14557e-48	ITPR1
rs151234	16	28494339	C	G	0.0555228	0.0113465	9.91129e-07	ITPR1
rs12445050	16	81837364	T	C	0.0799421	0.0109728	3.20553e-13	ITPR1
rs117694034	19	40950322	A	T	0.103843	0.0191029	5.44967e-08	ITPR1
rs3826688	19	44915704	C	T	0.0412035	0.00799132	2.52238e-07	ITPR1
rs1654425	19	55027612	C	T	0.120328	0.0102989	1.54668e-31	ITPR1
rs68066031	2	224015781	C	T	-0.13765	0.00911554	1.60472e-51	ITPR1
rs6081569	20	19323142	C	G	0.0526665	0.00789418	2.53105e-11	ITPR1
rs76604555	3	4814601	A	G	-0.137779	0.0117435	8.69961e-32	ITPR1
rs1354034	3	56815721	C	T	-0.0594688	0.00774252	1.58088e-14	ITPR1
rs4698974	4	101858157	A	T	-0.0430227	0.00764582	1.83413e-08	ITPR1
rs78947501	4	153538803	C	G	0.127768	0.0217211	4.04837e-09	ITPR1
rs10058074	5	132350453	A	G	-0.0447977	0.0076291	4.30705e-09	ITPR1
rs9358888	6	25759245	C	T	0.041633	0.00833995	5.97558e-07	ITPR1
rs35173808	6	31358371	A	C	-0.075369	0.0128878	4.9721e-09	ITPR1
rs2163293	6	157608472	T	C	-0.0435052	0.00860248	4.25265e-07	ITPR1
rs6961069	7	80589645	T	C	0.0432942	0.00777533	2.5746e-08	ITPR1
rs10096633	8	19973410	T	C	-0.0573465	0.0115543	6.93426e-07	ITPR1
rs116894624	8	94113046	A	G	0.146166	0.0279837	1.75821e-07	ITPR1
rs6993770	8	105569300	T	A	-0.0945653	0.00841245	2.56153e-29	ITPR1
rs296849	9	4780007	A	T	0.0383439	0.00766947	5.74632e-07	ITPR1
rs9410216	9	88823143	G	A	-0.0756722	0.0145162	1.85849e-07	ITPR1
rs10832016	11	2421460	C	G	0.042188	0.00785211	7.7514e-08	KDM3A
rs73178169	13	47243986	G	A	0.0532914	0.0104839	3.71168e-07	KDM3A
rs12588969	14	102764421	C	G	-0.0592786	0.00825024	6.71738e-13	KDM3A
rs72961305	18	72324703	A	C	0.0491381	0.00994928	7.85814e-07	KDM3A
rs10423223	19	47193079	G	A	0.0476338	0.00875788	5.35932e-08	KDM3A
rs72836346	2	111119036	C	G	0.0799805	0.0146558	4.8356e-08	KDM3A
rs3087243	2	203874196	A	G	-0.0443421	0.00770677	8.73313e-09	KDM3A
rs6798398	3	46153146	T	C	-0.0385715	0.00774766	6.40885e-07	KDM3A
rs11709472	3	188359798	T	C	-0.0416537	0.00778091	8.63555e-08	KDM3A
rs4548048	6	32657245	T	C	0.140921	0.0131543	8.85523e-27	KDM3A
rs2857115	6	32810504	A	G	0.0489877	0.00882483	2.83851e-08	KDM3A
rs111683935	7	17440574	T	A	-0.119792	0.0180994	3.6266e-11	KDM3A
rs117931812	7	80975522	C	A	-0.108462	0.0216381	5.37118e-07	KDM3A
rs10957978	8	80372904	T	G	0.0553415	0.0080468	6.09256e-12	KDM3A
rs8177654	10	5973234	C	T	0.0344985	0.00660229	1.7394e-07	KIR2DL2
rs10824722	10	79145785	T	C	0.0383991	0.00739147	2.04659e-07	KIR2DL2
rs751514	10	124678362	C	T	-0.0540656	0.00819592	4.20533e-11	KIR2DL2
rs10794315	11	350580	T	C	-0.0347201	0.00696688	6.24137e-07	KIR2DL2
rs34992608	12	10481537	A	G	-0.087181	0.00949832	4.36817e-20	KIR2DL2
rs10774625	12	111472415	G	A	-0.0701401	0.00619549	1.03086e-29	KIR2DL2
rs7182229	15	58472984	G	T	-0.0608626	0.00988591	7.43704e-10	KIR2DL2
rs17250967	17	47746096	C	T	0.0677736	0.0130447	2.04183e-07	KIR2DL2
rs34550916	19	54542987	G	A	-0.0867796	0.0129686	2.20851e-11	KIR2DL2
rs272409	19	54598940	C	T	0.0902847	0.016678	6.18415e-08	KIR2DL2
rs4806612	19	54894771	C	T	-0.0968299	0.0127724	3.42373e-14	KIR2DL2
rs2037147	2	2536614	C	T	-0.0307128	0.00623842	8.5155e-07	KIR2DL2
rs11729255	4	9743309	A	G	0.0377468	0.00742065	3.64309e-07	KIR2DL2
rs30378	5	96786290	G	A	-0.0475486	0.0065754	4.7841e-13	KIR2DL2
rs112066464	6	27478863	G	C	0.113345	0.0221675	3.16847e-07	KIR2DL2
rs12374669	6	28765642	T	C	-0.143844	0.0266795	6.9857e-08	KIR2DL2
rs3094063	6	30376504	T	C	-0.386407	0.0123015	1e-200	KIR2DL2
rs3218820	6	30912379	A	G	0.428352	0.026674	4.96249e-58	KIR2DL2
rs9501045	6	31067421	A	G	-0.273719	0.00847366	1e-200	KIR2DL2
rs115978492	6	31609086	A	C	-0.17488	0.0180466	3.31055e-22	KIR2DL2
rs73556620	9	136132878	T	C	-0.0425578	0.00767868	2.98476e-08	KIR2DL2
rs12084898	1	93676491	C	G	-0.0491492	0.00979449	5.21999e-07	KIRREL2
rs61747728	1	179557079	T	C	0.120426	0.0190408	2.53858e-10	KIRREL2
rs10848961	12	429128	G	A	0.0520032	0.00831348	3.9678e-10	KIRREL2
rs11840862	13	42382327	G	A	0.0463909	0.00801718	7.18952e-09	KIRREL2
rs79160980	13	98723196	G	C	-0.106033	0.0201389	1.4011e-07	KIRREL2
rs2494743	14	104785383	C	T	0.0733388	0.0128625	1.18593e-08	KIRREL2
rs56403110	15	58718163	T	A	-0.0381318	0.00740018	2.5659e-07	KIRREL2
rs421195	16	283146	T	C	-0.306224	0.0120092	2.01837e-143	KIRREL2
rs432925	16	284580	C	G	0.046217	0.00826309	2.22946e-08	KIRREL2
rs4238595	16	20331769	C	T	0.0490996	0.00797006	7.2512e-10	KIRREL2
rs8045196	16	75222462	G	T	-0.109085	0.008424	2.36919e-38	KIRREL2
rs2434891	16	77384833	T	A	-0.0520892	0.0100922	2.45166e-07	KIRREL2
rs1673931	16	88910069	C	T	0.0672483	0.00759345	8.28705e-19	KIRREL2
rs12945299	17	7176750	G	A	0.0663617	0.00914682	4.01144e-13	KIRREL2
rs62069108	17	70212273	A	G	-0.0574556	0.0117213	9.49511e-07	KIRREL2
rs404299	19	35858850	A	G	-0.458579	0.0205111	1.01859e-110	KIRREL2
rs187805589	19	35881564	C	T	0.190264	0.0295346	1.17856e-10	KIRREL2
rs62109670	19	35918108	A	G	0.0791238	0.0146955	7.27679e-08	KIRREL2
rs113020707	19	36129010	T	C	-0.161206	0.0137754	1.23851e-31	KIRREL2
rs2638280	19	48706061	A	G	-0.0661409	0.0074811	9.482e-19	KIRREL2
rs56097005	2	20074166	T	G	0.0446691	0.00750894	2.70128e-09	KIRREL2
rs12692777	2	165766678	A	T	0.0384955	0.00733855	1.55726e-07	KIRREL2
rs6020348	20	50186457	A	G	-0.0457654	0.00746541	8.7696e-10	KIRREL2
rs11759956	6	7108864	T	C	0.0535702	0.00737185	3.67959e-13	KIRREL2
rs6571015	6	96086602	A	G	0.151934	0.00902722	1.45479e-63	KIRREL2
rs2730265	7	159052693	T	C	0.0423764	0.00783594	6.3747e-08	KIRREL2
rs819185	8	23894869	T	C	-0.0363444	0.00742014	9.67832e-07	KIRREL2
rs608337	8	101499490	A	G	-0.0831192	0.0144687	9.20492e-09	KIRREL2
rs116842520	9	133078678	A	G	0.125886	0.0204366	7.28132e-10	KIRREL2
rs2013075	9	133227766	T	C	0.46893	0.0153247	1e-200	KIRREL2
rs183489441	9	133584820	A	G	0.069254	0.0132916	1.8846e-07	KIRREL2
rs3008870	1	66952344	T	C	0.0417504	0.0071737	5.88749e-09	LILRB4
rs75601653	11	65715899	G	C	0.0340076	0.00678252	5.33089e-07	LILRB4
rs11048473	12	26340881	T	C	0.0406946	0.00722132	1.74719e-08	LILRB4
rs3184504	12	111446804	C	T	-0.0541653	0.00636357	1.71277e-17	LILRB4
rs5029115	13	67569184	A	G	0.0529755	0.0100279	1.27204e-07	LILRB4
rs1955512	14	32706616	A	G	-0.0374598	0.00657802	1.23595e-08	LILRB4
rs11499034	14	81506097	C	T	0.13111	0.0267138	9.20407e-07	LILRB4
rs12917707	16	20356368	T	G	-0.0466706	0.00830575	1.91986e-08	LILRB4
rs1860200	17	34730458	A	C	-0.0341004	0.00643226	1.14879e-07	LILRB4
rs77542162	17	69085137	G	A	0.141606	0.021365	3.40487e-11	LILRB4
rs7247412	19	51810615	C	T	-0.0718475	0.00755677	1.9494e-21	LILRB4
rs71365469	19	54510256	A	G	0.0935089	0.00852317	5.26138e-28	LILRB4
rs417477	19	54660452	G	A	0.380751	0.0103352	1e-200	LILRB4
rs3745871	19	54664289	T	C	-0.0980833	0.00697804	7.07946e-45	LILRB4
rs111438256	5	15135465	T	C	0.0717645	0.0143873	6.09916e-07	LILRB4
rs2844670	6	31037949	A	G	-0.304351	0.00964005	1e-200	LILRB4
rs576219752	6	32392150	T	A	-0.349341	0.0106281	1e-200	LILRB4
rs80263925	6	32936284	T	C	-0.155334	0.0181899	1.3471e-17	LILRB4
rs139394070	6	33117643	T	C	0.272856	0.0238417	2.50611e-30	LILRB4
rs9277952	6	33236497	A	G	-0.0667283	0.0112037	2.58654e-09	LILRB4
rs76346987	6	33853649	T	C	0.176489	0.0169805	2.65033e-25	LILRB4
rs13095	10	63154612	C	G	0.0581689	0.00753194	1.13658e-14	LRRC59
rs7080536	10	113588287	A	G	-0.094313	0.0186837	4.46756e-07	LRRC59
rs73396521	11	267568	A	G	0.0669005	0.00879547	2.82163e-14	LRRC59
rs10876550	12	54318524	A	G	0.0399341	0.00757627	1.35725e-07	LRRC59
rs10774624	12	111395984	A	G	-0.0416774	0.00756177	3.55599e-08	LRRC59
rs2332998	14	27433891	T	C	-0.0399447	0.00761455	1.55571e-07	LRRC59
rs1967556	17	29417015	G	T	-0.0415812	0.00756714	3.90787e-08	LRRC59
rs1354034	3	56815721	C	T	0.105227	0.00766712	7.2527e-43	LRRC59
rs2278668	3	123116385	C	T	-0.0410469	0.00774104	1.14222e-07	LRRC59
rs114694170	5	88884379	C	T	0.0876998	0.0160013	4.23448e-08	LRRC59
rs6866614	5	132451445	G	A	0.0426338	0.00769818	3.05661e-08	LRRC59
rs593037	6	92415050	G	C	-0.0386491	0.00789178	9.71203e-07	LRRC59
rs342293	7	106731773	G	C	-0.0639507	0.00753185	2.054e-17	LRRC59
rs6993770	8	105569300	T	A	-0.0557113	0.00830903	2.01512e-11	LRRC59
rs61815559	1	152298743	T	A	0.229124	0.0199176	1.26503e-30	LY6D
rs905938	1	155018913	C	T	0.0888953	0.00798116	8.18088e-29	LY6D
rs117291242	11	380315	T	C	0.102732	0.0184278	2.47742e-08	LY6D
rs3814773	12	52907012	C	A	0.118925	0.0201883	3.84344e-09	LY6D
rs61029578	14	51442461	T	C	-0.0686384	0.0131541	1.80863e-07	LY6D
rs17658212	15	40853721	T	C	-0.0811817	0.0152065	9.36613e-08	LY6D
rs28459661	15	55329691	C	T	-0.0433603	0.00744533	5.75162e-09	LY6D
rs77924615	16	20381010	A	G	-0.0684129	0.00894213	1.99986e-14	LY6D
rs7259936	19	38282338	C	T	-0.0631072	0.00943635	2.26725e-11	LY6D
rs56035820	19	51016454	T	C	0.0585944	0.00839277	2.91944e-12	LY6D
rs7613473	3	190303767	A	G	0.0376102	0.00718316	1.64191e-07	LY6D
rs2870238	4	76451926	T	C	0.0492626	0.00700676	2.05494e-12	LY6D
rs9472138	6	43844025	T	C	-0.0424628	0.00775782	4.41113e-08	LY6D
rs6464165	7	151716038	C	T	0.0485392	0.00779007	4.63756e-10	LY6D
rs36071802	8	23858358	C	T	0.0436223	0.00768178	1.3575e-08	LY6D
rs12056667	8	94780219	C	A	-0.0596437	0.00993364	1.92265e-09	LY6D
rs73716136	8	142172909	A	G	-0.0685054	0.0125595	4.91236e-08	LY6D
rs58624742	8	142538687	T	C	-0.104895	0.0106133	4.91813e-23	LY6D
rs9297976	8	142670817	C	T	-0.253172	0.00757455	1e-200	LY6D
rs58225377	8	142898244	C	T	0.293046	0.0174886	5.08159e-63	LY6D
rs34517439	1	77984833	A	C	0.0524747	0.0102436	3.0119e-07	MEGF10
rs12758626	1	117549545	G	A	-0.0467845	0.00700828	2.46207e-11	MEGF10
rs56278466	10	17833858	G	T	0.0530693	0.00704714	5.0501e-14	MEGF10
rs508196	10	17974944	T	C	-0.0527868	0.00679135	7.68599e-15	MEGF10
rs9418121	10	34776317	T	C	-0.0378383	0.00760147	6.43221e-07	MEGF10
rs6585308	10	114967773	A	G	0.0426254	0.00676847	3.02218e-10	MEGF10
rs11039336	11	47684589	G	A	0.0338884	0.00672932	4.75521e-07	MEGF10
rs7232	11	60173126	A	T	0.0514167	0.00695122	1.39508e-13	MEGF10
rs2236653	11	126413890	T	C	0.0513754	0.00675663	2.87806e-14	MEGF10
rs7294326	12	485008	T	G	-0.059243	0.00671228	1.08418e-18	MEGF10
rs632887	12	3283185	G	A	0.0802862	0.00688901	2.18323e-31	MEGF10
rs7304148	12	10717632	C	T	-0.0461073	0.00751704	8.58598e-10	MEGF10
rs2634675	12	48347072	G	A	-0.0477605	0.00672003	1.1844e-12	MEGF10
rs7312770	12	56073803	T	C	-0.033131	0.00673301	8.62442e-07	MEGF10
rs556140	13	80394824	A	G	0.0378309	0.00733792	2.52901e-07	MEGF10
rs57856432	14	35250502	T	G	0.0426703	0.0067856	3.20826e-10	MEGF10
rs3007036	14	49639327	G	A	0.0567527	0.00672225	3.10599e-17	MEGF10
rs30227	16	14311571	T	C	-0.0362667	0.00681236	1.01704e-07	MEGF10
rs55714927	17	7176997	T	C	0.0573683	0.00861211	2.71331e-11	MEGF10
rs2905787	17	31155363	A	G	-0.037418	0.00744222	4.96147e-07	MEGF10
rs77542162	17	69085137	G	A	0.798695	0.0228214	1e-200	MEGF10
rs72631343	17	69195129	G	C	-0.226093	0.0103123	1.51008e-106	MEGF10
rs13019008	2	9553607	A	G	0.0327904	0.00668313	9.27385e-07	MEGF10
rs11896061	2	203229858	A	G	0.0380542	0.00684511	2.7082e-08	MEGF10
rs6068599	20	53643079	C	T	-0.0566053	0.00717323	2.99295e-15	MEGF10
rs73158808	22	19066647	C	G	-0.0671748	0.00848397	2.41657e-15	MEGF10
rs5757752	22	39629232	C	G	0.0378869	0.00719457	1.39393e-07	MEGF10
rs11718898	3	12807323	C	T	0.0687649	0.007078	2.59478e-22	MEGF10
rs62276885	3	98978008	T	G	0.0595825	0.00872052	8.34834e-12	MEGF10
rs1468906	3	186930328	G	A	-0.039503	0.00699541	1.63286e-08	MEGF10
rs7659414	4	176429805	C	A	-0.0377164	0.0067787	2.6373e-08	MEGF10
rs62394368	5	126727748	T	C	-0.0433067	0.0073393	3.62051e-09	MEGF10
rs28528146	5	126869463	G	A	0.233422	0.0072989	1e-200	MEGF10
rs72786484	5	127342421	G	A	-0.338534	0.0295191	1.90371e-30	MEGF10
rs113794264	5	127396728	T	C	0.199039	0.0326816	1.12743e-09	MEGF10
rs56914580	5	127403796	A	G	0.83254	0.0194375	1e-200	MEGF10
rs76668152	5	127617876	A	T	-0.183497	0.0323411	1.39672e-08	MEGF10
rs4705059	5	148819436	T	C	-0.0468399	0.00735545	1.91434e-10	MEGF10
rs6938239	6	34715858	A	G	-0.0655056	0.0096193	9.77237e-12	MEGF10
rs200889152	6	117186819	C	A	-0.0652902	0.00694414	5.34318e-21	MEGF10
rs2297212	6	160276293	A	G	-0.08477	0.0165884	3.21803e-07	MEGF10
rs4841132	8	9326086	G	A	-0.0761274	0.0115923	5.13216e-11	MEGF10
rs7005788	8	51737508	G	A	-0.0422853	0.0076556	3.32415e-08	MEGF10
rs72666518	8	65655413	C	T	0.0839143	0.0153016	4.15729e-08	MEGF10
rs12681287	8	86257307	A	C	-0.0458786	0.0077028	2.58333e-09	MEGF10
rs10813959	9	33166236	C	T	0.0773775	0.00678713	4.15145e-30	MEGF10
rs13292932	9	133270009	A	C	0.0451535	0.0073109	6.56689e-10	MEGF10
rs78240296	11	79503847	A	G	-0.149728	0.0302407	7.37531e-07	MMP15
rs187793617	14	105894833	G	C	0.122757	0.0108534	1.16413e-29	MMP15
rs286266	19	11742733	C	A	-0.0378094	0.00770731	9.31151e-07	MMP15
rs145070498	3	36944375	T	C	0.10723	0.0218543	9.26702e-07	MMP15
rs13183885	5	154613742	C	T	0.046112	0.0094173	9.75484e-07	MMP15
rs144744138	1	186400848	A	T	0.118182	0.0233074	3.96616e-07	MPRIP
rs1260326	2	27508073	C	T	-0.0394226	0.00781559	4.55659e-07	MPRIP
rs4851431	2	101389211	T	C	-0.0445793	0.00821924	5.83539e-08	MPRIP
rs3910516	2	215438330	G	A	0.0714447	0.00865082	1.47231e-16	MPRIP
rs11718484	3	196108533	A	G	0.059706	0.0121104	8.21618e-07	MPRIP
rs1914688	6	117758760	T	C	-0.0734685	0.0140349	1.65261e-07	MPRIP
rs6427756	1	199031598	G	A	-0.0448629	0.0085295	1.44265e-07	MTSS2
rs3811444	1	247876149	T	C	-0.0426463	0.00792936	7.52021e-08	MTSS2
rs74590628	10	1742527	C	G	0.142465	0.0284237	5.38121e-07	MTSS2
rs964184	11	116778201	C	G	-0.0548647	0.0109836	5.87977e-07	MTSS2
rs7297265	12	54325905	G	A	0.0735475	0.00756497	2.42661e-22	MTSS2
rs6488995	12	125325442	T	C	-0.0387811	0.0078432	7.63203e-07	MTSS2
rs138731312	16	71228635	A	G	0.215573	0.0417461	2.41858e-07	MTSS2
rs699450	16	72049753	C	T	-0.145096	0.0268572	6.57189e-08	MTSS2
rs1260326	2	27508073	C	T	-0.0443963	0.00765441	6.6275e-09	MTSS2
rs1354034	3	56815721	C	T	0.0571207	0.00760077	5.68591e-14	MTSS2
rs114694170	5	88884379	C	T	0.0905455	0.0158781	1.18029e-08	MTSS2
rs56399423	5	132336964	C	T	-0.0401881	0.00753185	9.51503e-08	MTSS2
rs6993770	8	105569300	T	A	0.0635998	0.00823991	1.17706e-14	MTSS2
rs4742045	9	4746363	G	T	-0.048649	0.00761466	1.67132e-10	MTSS2
rs113315674	9	97957771	A	G	0.076429	0.00777287	8.13205e-23	MTSS2
rs73554584	9	132997156	C	A	0.0758927	0.0153814	8.05416e-07	MTSS2
rs12765395	10	69650850	A	G	0.0474592	0.00967618	9.3547e-07	MYL4
rs117344193	20	51738324	A	C	0.07737	0.0153449	4.605e-07	MYL4
rs62366175	5	82518887	G	A	-0.0426195	0.00842289	4.19344e-07	MYL4
rs143723197	6	29974750	C	T	0.121599	0.0152606	1.6099e-15	MYL4
rs111803166	6	30158448	G	A	0.331239	0.0389871	1.96065e-17	MYL4
rs6592965	7	50360284	A	G	-0.0381411	0.00743056	2.85167e-07	MYL4
rs79434143	1	147682397	G	T	0.0839286	0.0149148	1.83139e-08	NAA10
rs34702889	12	17501230	A	C	-0.0472658	0.00940103	4.96341e-07	NAA10
rs11170874	12	54332691	G	A	0.0468192	0.00826523	1.4737e-08	NAA10
rs10774624	12	111395984	A	G	-0.0383241	0.00771089	6.69098e-07	NAA10
rs147197046	13	22582592	A	C	0.121677	0.0244659	6.58052e-07	NAA10
rs72759222	15	96966887	G	A	-0.0619548	0.0123644	5.42263e-07	NAA10
rs11647329	16	59650058	G	C	-0.0387798	0.00788899	8.84749e-07	NAA10
rs1354034	3	56815721	C	T	0.0545422	0.00781902	3.04579e-12	NAA10
rs6866614	5	132451445	G	A	0.0419291	0.00786627	9.80867e-08	NAA10
rs692502	9	4745645	A	G	0.0439594	0.00781512	1.85592e-08	NAA10
rs11815828	10	66863519	G	C	-0.0608017	0.0118377	2.80227e-07	NACC1
rs10786695	10	102608999	C	A	-0.0411247	0.00753438	4.80784e-08	NACC1
rs74577529	20	13400121	T	C	0.100779	0.0196897	3.08148e-07	NACC1
rs409801	9	4744743	C	T	0.0388437	0.00748846	2.13535e-07	NACC1
rs7536135	1	45393660	A	G	0.0406162	0.00769838	1.32075e-07	NCR3LG1
rs77035081	1	160257593	A	G	0.0902012	0.0175644	2.81475e-07	NCR3LG1
rs7535475	1	161493797	A	C	-0.0358652	0.00688572	1.90239e-07	NCR3LG1
rs61747728	1	179557079	T	C	0.134734	0.0173173	7.23602e-15	NCR3LG1
rs10832688	11	16821828	A	G	-0.0383897	0.00695282	3.36194e-08	NCR3LG1
rs7937770	11	17017480	C	T	-0.221192	0.0070002	1e-200	NCR3LG1
rs1989133	11	17355392	A	G	0.109111	0.00741362	4.96364e-49	NCR3LG1
rs7950189	11	17446770	C	T	0.0647816	0.00691559	7.43019e-21	NCR3LG1
rs10741729	11	17540566	A	G	0.0606556	0.0071825	3.04299e-17	NCR3LG1
rs36027301	11	68041801	T	C	0.107401	0.0149156	5.99653e-13	NCR3LG1
rs7103461	11	126369390	G	C	-0.059282	0.0102044	6.2683e-09	NCR3LG1
rs7137686	12	26676476	T	C	0.0383249	0.00671454	1.1448e-08	NCR3LG1
rs28544423	16	20348311	T	C	-0.0584839	0.00863237	1.24451e-11	NCR3LG1
rs117251799	16	67771357	A	T	-0.161014	0.032073	5.16072e-07	NCR3LG1
rs55714927	17	7176997	T	C	0.122541	0.00841446	4.82059e-48	NCR3LG1
rs79715480	17	7189533	C	G	-0.0589995	0.011445	2.53589e-07	NCR3LG1
rs2659005	17	81244914	T	C	0.04324	0.00672055	1.24291e-10	NCR3LG1
rs8084848	18	76817938	G	A	-0.0415284	0.00692501	2.0115e-09	NCR3LG1
rs45512696	19	35059974	T	C	-0.0517996	0.00877814	3.61352e-09	NCR3LG1
rs11881404	19	35530291	G	A	0.0449897	0.00683166	4.53419e-11	NCR3LG1
rs12980852	19	53842839	A	G	-0.0573537	0.00714472	9.95405e-16	NCR3LG1
rs4407212	2	160391860	A	C	-0.0366434	0.00667883	4.09949e-08	NCR3LG1
rs11689257	2	162101843	A	G	-0.0698212	0.0134892	2.2659e-07	NCR3LG1
rs1047891	2	210675783	A	C	0.0498772	0.00720568	4.45554e-12	NCR3LG1
rs6071887	20	39992814	G	A	-0.0409895	0.00780459	1.50477e-07	NCR3LG1
rs73065135	3	46847019	C	G	0.0575853	0.0114446	4.86284e-07	NCR3LG1
rs3749260	3	98532018	A	C	0.141937	0.0104813	8.83894e-42	NCR3LG1
rs13063161	3	98586455	G	A	-0.208975	0.00682443	1e-200	NCR3LG1
rs73138019	3	98842453	C	T	-0.132414	0.0182873	4.46067e-13	NCR3LG1
rs145318626	3	99138167	G	A	0.0979332	0.0158857	7.05505e-10	NCR3LG1
rs150814291	3	99212677	T	A	0.15381	0.0278639	3.38953e-08	NCR3LG1
rs10058350	5	43141542	C	T	0.0620536	0.00729615	1.81593e-17	NCR3LG1
rs2070722	5	132488794	C	A	-0.0379044	0.00703051	6.99085e-08	NCR3LG1
rs13201202	6	44890006	A	C	0.0342653	0.00672395	3.46889e-07	NCR3LG1
rs4945829	6	109317625	C	T	-0.0349653	0.00702012	6.33432e-07	NCR3LG1
rs6924387	6	136761810	G	A	-0.0419128	0.00681362	7.68352e-10	NCR3LG1
rs4841132	8	9326086	G	A	-0.0692443	0.0115138	1.80963e-09	NCR3LG1
rs4737010	8	41772929	A	G	-0.0405391	0.00795148	3.42705e-07	NCR3LG1
rs2519093	9	133266456	T	C	-0.325479	0.00874385	1e-200	NCR3LG1
rs76643124	9	133491326	A	G	0.189577	0.0277938	9.05107e-12	NCR3LG1
rs2055975	1	150646156	C	A	0.0377678	0.00746424	4.19624e-07	NCS1
rs7902343	10	63245639	T	C	0.0456701	0.00678956	1.7378e-11	NCS1
rs7119933	11	78338704	C	A	-0.0487086	0.00900741	6.38675e-08	NCS1
rs964184	11	116778201	C	G	-0.0631108	0.00999081	2.66895e-10	NCS1
rs2393791	12	120986153	T	C	-0.0351673	0.00699947	5.05312e-07	NCS1
rs10847690	12	128787697	C	T	0.0731789	0.0142105	2.60988e-07	NCS1
rs648548	16	89683028	G	C	0.0374155	0.00688834	5.58162e-08	NCS1
rs150198304	17	60708271	A	G	0.133462	0.0271957	9.22614e-07	NCS1
rs12611191	19	11023414	G	A	-0.0412388	0.00776873	1.1065e-07	NCS1
rs67210567	19	40851552	T	G	0.111867	0.0213956	1.70899e-07	NCS1
rs157595	19	44922203	G	A	0.0369476	0.0071226	2.13275e-07	NCS1
rs9807819	19	45736340	T	C	-0.0558871	0.00704941	2.22844e-15	NCS1
rs1862069	2	169077231	A	G	-0.0476226	0.00681469	2.78356e-12	NCS1
rs187355703	2	176128855	G	C	0.119167	0.021606	3.4784e-08	NCS1
rs11689895	2	213073829	T	G	0.0343178	0.00680427	4.56951e-07	NCS1
rs6065904	20	45906012	A	G	-0.0557326	0.00821064	1.13815e-11	NCS1
rs364955	4	68730262	A	T	-0.0412321	0.00795984	2.21866e-07	NCS1
rs10027275	4	148060345	C	G	0.0397073	0.00780707	3.65561e-07	NCS1
rs6816767	4	156782780	G	A	-0.0488361	0.00808169	1.51457e-09	NCS1
rs4704825	5	156955297	G	A	0.0514756	0.00708171	3.6266e-13	NCS1
rs7742404	6	24463160	T	A	0.116333	0.0106029	5.22516e-28	NCS1
rs13217434	6	32617611	C	G	0.0480409	0.00790713	1.23498e-09	NCS1
rs856589	7	46694709	A	G	0.0362512	0.00728825	6.5613e-07	NCS1
rs55747707	7	73623036	A	G	-0.0485935	0.00845792	9.17445e-09	NCS1
rs662	7	95308134	C	T	0.0611435	0.00750354	3.68129e-16	NCS1
rs854572	7	95325384	G	C	-0.0410555	0.00685523	2.11242e-09	NCS1
rs12342201	9	93132682	A	G	-0.0706792	0.00683992	4.97966e-25	NCS1
rs1054879	9	130233489	A	G	0.117747	0.0068332	1.53922e-66	NCS1
rs79943813	9	130427195	A	G	-0.204068	0.0328328	5.12024e-10	NCS1
rs635634	9	133279427	T	C	-0.048808	0.00885051	3.49349e-08	NCS1
rs79598313	1	26958422	T	C	-0.146266	0.0233811	3.95658e-10	NFASC
rs61804211	1	161701516	T	G	0.0640913	0.0115646	2.99013e-08	NFASC
rs3010065	1	183861647	G	A	0.0452063	0.00902776	5.5148e-07	NFASC
rs2093539	1	204816087	T	C	0.383353	0.0125599	1e-200	NFASC
rs77733547	1	204906132	A	G	-0.0831792	0.0163179	3.44342e-07	NFASC
rs16854835	1	204971487	A	G	0.478999	0.0143427	1e-200	NFASC
rs72751491	1	204973540	G	A	0.75568	0.0213396	1e-200	NFASC
rs115084809	1	205281020	T	G	-0.105538	0.0148082	1.02565e-12	NFASC
rs56278466	10	17833858	G	T	0.167094	0.00714694	6.85488e-121	NFASC
rs79372177	10	17957904	G	A	0.115429	0.0233905	8.0201e-07	NFASC
rs196227	10	119742187	A	G	0.0342014	0.00688481	6.77673e-07	NFASC
rs12424336	12	24003966	G	A	-0.0381615	0.00750146	3.63371e-07	NFASC
rs2229357	12	57449928	A	G	0.0390504	0.00776765	4.97405e-07	NFASC
rs28929474	14	94378610	T	C	0.146447	0.0235891	5.35698e-10	NFASC
rs113352275	15	78548225	T	C	-0.0443785	0.00831673	9.49926e-08	NFASC
rs6540056	16	87528090	A	G	-0.0390328	0.00755048	2.34623e-07	NFASC
rs56244095	17	7160580	A	C	0.0427901	0.00846586	4.31668e-07	NFASC
rs7232722	18	57455493	G	T	0.0585179	0.0109222	8.42946e-08	NFASC
rs868876	19	7766340	T	A	-0.0449268	0.00735486	1.00603e-09	NFASC
rs3747207	22	43928975	A	G	0.0655081	0.00815128	9.2406e-16	NFASC
rs11130628	3	58330108	C	T	-0.0825269	0.0123302	2.18474e-11	NFASC
rs687339	3	136213517	T	C	0.042187	0.00805976	1.6563e-07	NFASC
rs13164506	5	158815537	A	G	0.0446504	0.00895868	6.22716e-07	NFASC
rs13153019	5	177355217	C	T	0.0436924	0.00784976	2.60531e-08	NFASC
rs634501	5	180791668	G	A	0.0411214	0.00767666	8.47657e-08	NFASC
rs2244020	6	31379674	G	A	0.035966	0.00706456	3.56107e-07	NFASC
rs12215906	6	119267657	T	A	-0.041505	0.00704534	3.83575e-09	NFASC
rs2481061	9	33106141	G	A	0.0369268	0.00690859	9.0392e-08	NFASC
rs2519093	9	133266456	T	C	-0.0903294	0.00872065	3.84503e-25	NFASC
rs8106249	19	46359213	T	A	-0.0406119	0.00788908	2.63481e-07	NFX1
rs1260326	2	27508073	C	T	-0.0420665	0.00764866	3.80111e-08	NFX1
rs72949044	2	106839215	A	G	-0.135009	0.0271105	6.35931e-07	NFX1
rs1354034	3	56815721	C	T	0.0569065	0.00759056	6.5283e-14	NFX1
rs1956182	14	58976814	A	G	0.0570936	0.0104104	4.15174e-08	NINJ1
rs8023119	14	106643979	A	G	-0.0451733	0.00866709	1.86763e-07	NINJ1
rs78573683	15	61104171	A	G	-0.0693195	0.0135071	2.86576e-07	NINJ1
rs10048950	3	101616237	T	C	0.139986	0.0269593	2.07525e-07	NINJ1
rs9380344	6	33111912	T	C	0.105984	0.0208588	3.75405e-07	NINJ1
rs75776206	9	93030933	C	T	0.0959031	0.0186111	2.56342e-07	NINJ1
rs7033638	9	93121503	C	T	-0.280892	0.0095804	5.86138e-189	NINJ1
rs12346395	9	93136424	A	G	-0.240411	0.0267087	2.23203e-19	NINJ1
rs4744241	9	93462019	A	C	0.0763179	0.0154906	8.36238e-07	NINJ1
rs77544657	3	184267322	C	T	-0.075154	0.0151576	7.1159e-07	NOP56
rs62385135	5	158316354	T	C	-0.172211	0.0318593	6.4677e-08	NOP56
rs78223884	8	10989879	A	C	-0.0924508	0.0177736	1.97601e-07	NOP56
rs1337526	1	47499458	G	A	0.072419	0.00910142	1.76441e-15	NPHS1
rs12127124	1	184311395	G	C	0.0460143	0.00731158	3.10692e-10	NPHS1
rs619155	10	28692432	A	G	0.0543203	0.00808128	1.79556e-11	NPHS1
rs1519125	11	16223042	C	G	-0.039535	0.00737811	8.39557e-08	NPHS1
rs36015484	11	32510319	T	C	0.0663054	0.0113945	5.91807e-09	NPHS1
rs2298475	11	126408308	C	T	-0.0923236	0.0136244	1.23254e-11	NPHS1
rs34176686	12	12896085	A	G	0.059924	0.0100103	2.14714e-09	NPHS1
rs36060036	16	20350628	T	C	0.0532616	0.00970245	4.0307e-08	NPHS1
rs7225219	17	64330199	A	T	0.0387318	0.00762457	3.77685e-07	NPHS1
rs7223939	17	81267721	G	A	-0.0471056	0.00736288	1.57721e-10	NPHS1
rs79684932	19	35329599	C	T	-0.16102	0.0192918	7.02749e-17	NPHS1
rs61747965	19	35622688	G	A	-0.124412	0.020002	4.97302e-10	NPHS1
rs62112192	19	35810028	A	G	-0.256907	0.00805412	1e-200	NPHS1
rs2023866	19	36072224	C	T	0.0803239	0.0078252	1.01555e-24	NPHS1
rs2967469	19	36494742	G	A	0.0426028	0.00832676	3.11466e-07	NPHS1
rs142550499	19	38596784	G	C	-0.194992	0.0294846	3.75751e-11	NPHS1
rs62125038	2	18495164	T	C	-0.0420535	0.00777318	6.2997e-08	NPHS1
rs140060856	3	101557017	A	G	-0.202314	0.0390684	2.23723e-07	NPHS1
rs4833099	4	38808162	A	T	-0.0546995	0.0100804	5.75321e-08	NPHS1
rs1452374	4	81361079	C	T	0.0477646	0.00777671	8.14854e-10	NPHS1
rs4835019	4	145835131	G	A	0.0490543	0.00995256	8.27332e-07	NPHS1
rs9383023	6	15109472	C	T	-0.0576514	0.00832872	4.45246e-12	NPHS1
rs2014400	6	57388240	C	T	-0.0371594	0.00753733	8.22091e-07	NPHS1
rs6569080	6	119403009	A	T	-0.0370552	0.00719379	2.59102e-07	NPHS1
rs75425323	1	171713311	C	A	-0.0687145	0.0136449	4.75587e-07	NRP2
rs11607295	11	44579564	T	C	0.0371951	0.00717025	2.13231e-07	NRP2
rs174535	11	61783884	C	T	0.040007	0.00743636	7.45195e-08	NRP2
rs10771162	12	25050768	G	A	0.0643347	0.0119301	6.94368e-08	NRP2
rs2137537	12	70719307	C	T	-0.0471981	0.00718428	5.04429e-11	NRP2
rs1070073	12	103606541	G	T	0.0724568	0.0076075	1.65997e-21	NRP2
rs3751198	12	103753429	G	A	0.0658233	0.00736466	3.97283e-19	NRP2
rs78440108	14	92603941	T	C	-0.0554111	0.0094235	4.10025e-09	NRP2
rs77303550	16	72045758	T	C	-0.0497828	0.00899011	3.06817e-08	NRP2
rs12469959	2	43576587	A	G	0.0632431	0.0106622	3.00186e-09	NRP2
rs4611630	2	62386332	A	G	0.0622043	0.00916932	1.16923e-11	NRP2
rs2289023	2	205121597	G	A	-0.202243	0.00865767	1.09144e-120	NRP2
rs3771004	2	205766163	T	C	0.120859	0.00829038	3.86545e-48	NRP2
rs1990708	2	205789399	A	C	0.112206	0.0106358	5.08511e-26	NRP2
rs16837745	2	205868759	T	C	-0.0529045	0.00764095	4.39643e-12	NRP2
rs13734	20	17614084	A	G	-0.0492012	0.00923314	9.88849e-08	NRP2
rs8129434	21	32466291	C	T	0.0380468	0.00722243	1.38016e-07	NRP2
rs738409	22	43928847	G	C	0.0476125	0.00860324	3.12565e-08	NRP2
rs56063910	3	46436335	T	C	-0.0752206	0.00986982	2.51189e-14	NRP2
rs13081028	3	52521300	A	G	0.059329	0.00719678	1.66802e-16	NRP2
rs6794695	3	58437771	C	A	-0.0570901	0.00945174	1.53957e-09	NRP2
rs76651220	3	132569653	A	C	-0.0958191	0.0166727	9.08134e-09	NRP2
rs13135092	4	102276925	G	A	0.0765359	0.0129834	3.74878e-09	NRP2
rs55818129	5	39424990	G	T	-0.0764757	0.0111126	5.90745e-12	NRP2
rs2853923	6	31297960	G	A	-0.0400845	0.00715834	2.14729e-08	NRP2
rs2844572	6	31367798	C	A	-0.0780396	0.00751653	2.98195e-25	NRP2
rs1188873	6	138900713	T	G	-0.0500445	0.00928125	6.96755e-08	NRP2
rs56287412	7	17939205	C	T	0.0618804	0.00718141	6.88811e-18	NRP2
rs12537745	7	150539762	T	G	-0.0513653	0.00841888	1.05274e-09	NRP2
rs2736362	8	11240828	T	C	-0.0411227	0.00748428	3.91715e-08	NRP2
rs41341748	8	16155085	A	G	0.195912	0.0340735	8.94067e-09	NRP2
rs113557100	1	39049841	T	C	-0.0509167	0.0104008	9.80731e-07	PDZD2
rs7080536	10	113588287	A	G	-0.10187	0.0188328	6.33213e-08	PDZD2
rs140848491	11	21893313	A	G	-0.410515	0.0835907	9.06087e-07	PDZD2
rs111567773	11	117424601	T	C	-0.10035	0.0204683	9.45323e-07	PDZD2
rs12317124	12	18664828	T	C	-0.039714	0.00760644	1.77857e-07	PDZD2
rs11048929	12	27230373	C	T	0.0548732	0.0110618	7.02781e-07	PDZD2
rs6580981	12	54329244	A	G	0.0756925	0.00768271	6.69885e-23	PDZD2
rs79577179	17	77388316	A	G	-0.0976993	0.0189655	2.58518e-07	PDZD2
rs183711	5	31638368	G	T	0.39361	0.0140464	8.74984e-173	PDZD2
rs72755404	5	31691419	C	G	-0.0786419	0.0103085	2.3681e-14	PDZD2
rs13357887	5	31812859	A	G	-0.117695	0.0197889	2.7227e-09	PDZD2
rs342293	7	106731773	G	C	-0.0663151	0.00759428	2.49689e-18	PDZD2
rs57697431	1	7550778	T	C	0.123263	0.0213647	7.95317e-09	PER3
rs116323785	1	7674229	T	C	-0.31847	0.0384293	1.15985e-16	PER3
rs2153733	1	7770202	C	T	-0.329383	0.00957271	1e-200	PER3
rs72633055	1	7883259	A	G	0.104551	0.0103467	5.25896e-24	PER3
rs12025610	1	7903392	T	A	-0.242475	0.00848656	1.51356e-179	PER3
rs9657983	1	7933841	T	A	-0.159506	0.0310526	2.79692e-07	PER3
rs301804	1	8416381	G	C	-0.0443666	0.00820268	6.34498e-08	PER3
rs249177	12	95011497	T	C	-0.08625	0.00920087	6.9759e-21	PER3
rs11553699	12	121779004	G	A	-0.0572062	0.0109036	1.54996e-07	PER3
rs74035509	16	88500925	T	C	0.0740292	0.0133779	3.13531e-08	PER3
rs62059837	17	7624628	C	A	-0.0552244	0.0111159	6.76223e-07	PER3
rs4940755	18	58787925	A	G	-0.0428279	0.00722039	3.00151e-09	PER3
rs10803735	2	11420197	A	C	0.0365898	0.00744724	8.96004e-07	PER3
rs12468278	2	68418738	G	A	-0.0419079	0.00813543	2.58708e-07	PER3
rs1354034	3	56815721	C	T	0.0518138	0.00726415	9.83332e-13	PER3
rs6440003	3	141375367	A	G	-0.0504496	0.00717561	2.05494e-12	PER3
rs1601770	4	139129321	T	C	0.0495556	0.00772632	1.41867e-10	PER3
rs116740766	5	37820501	A	G	0.119223	0.0242537	8.8483e-07	PER3
rs2073643	5	132387596	C	T	-0.0354098	0.0072117	9.10542e-07	PER3
rs6993770	8	105569300	T	A	-0.132938	0.00790379	1.7555e-63	PER3
rs56949902	14	48779836	A	G	-0.122102	0.0243537	5.33974e-07	PKN3
rs78459732	16	34967248	A	G	0.112844	0.0226383	6.20726e-07	PKN3
rs1354034	3	56815721	C	T	0.0786554	0.00772912	2.52522e-24	PKN3
rs2161133	5	173027605	T	C	0.0546921	0.0106083	2.52802e-07	PKN3
rs17697415	7	86772500	A	G	0.0804472	0.0155952	2.49e-07	PKN3
rs13283282	9	128703202	G	C	0.215463	0.0107859	8.8308e-89	PKN3
rs150814100	1	181816155	T	C	0.19591	0.0357968	4.42874e-08	PLAT
rs2923099	11	10347793	A	C	0.0355767	0.00717929	7.21589e-07	PLAT
rs4576860	12	130788364	G	A	-0.0539191	0.00718338	6.09116e-14	PLAT
rs28929474	14	94378610	T	C	0.132329	0.0246291	7.7489e-08	PLAT
rs8112983	19	48726268	C	T	0.0688613	0.00707498	2.17921e-22	PLAT
rs1673872	3	103871322	A	G	-0.0398132	0.0076553	1.985e-07	PLAT
rs7765526	6	147392628	G	A	0.049576	0.00711667	3.25687e-12	PLAT
rs6954408	7	101159035	T	C	-0.0644339	0.00951607	1.2785e-11	PLAT
rs2701681	7	107653493	A	G	0.035287	0.0071079	6.88858e-07	PLAT
rs7826392	8	10763248	A	G	0.0414348	0.00828713	5.73614e-07	PLAT
rs2020921	8	42187447	A	G	-0.280448	0.0225765	1.98198e-35	PLAT
rs56887219	10	123866234	T	C	0.042948	0.00799551	7.80818e-08	PLCB1
rs35148001	12	71641783	G	A	0.233962	0.0453439	2.47303e-07	PLCB1
rs78553018	12	97096683	C	T	0.0887504	0.0176591	5.01453e-07	PLCB1
rs79670778	14	67483380	C	T	-0.0814059	0.0157185	2.231e-07	PLCB1
rs62149417	2	60856428	A	G	0.0396297	0.00798746	6.99536e-07	PLCB1
rs6789842	3	6997461	G	A	0.0425227	0.00848519	5.40356e-07	PLCB1
rs4504509	6	32431382	C	T	0.0560287	0.0096207	5.75387e-09	PLCB1
rs59679352	10	3642019	T	C	-0.0398102	0.00781007	3.44556e-07	PRC1
rs58324449	19	2485993	G	T	-0.0782191	0.0155348	4.77595e-07	PRC1
rs9269041	6	32470466	A	G	0.0391635	0.00797521	9.07737e-07	PRC1
rs10923354	1	117609619	C	T	0.0408902	0.00817892	5.74897e-07	PRSS27
rs2360962	1	199035580	T	A	-0.0564881	0.0077815	3.89135e-13	PRSS27
rs56278466	10	17833858	G	T	0.0377147	0.00715663	1.36502e-07	PRSS27
rs112972631	10	102598421	T	G	-0.0584147	0.00784101	9.34114e-14	PRSS27
rs546202	11	65742553	C	T	0.0645999	0.00691205	9.10332e-21	PRSS27
rs76447514	11	82521825	G	A	-0.136789	0.0276676	7.65226e-07	PRSS27
rs76925130	11	95511523	A	T	0.0776044	0.0156993	7.68564e-07	PRSS27
rs35156054	11	126365615	G	C	-0.155791	0.00851446	8.70162e-75	PRSS27
rs11220477	11	126405507	T	C	-0.526889	0.0171786	1e-200	PRSS27
rs7306988	12	510642	A	G	-0.0666792	0.00901605	1.40767e-13	PRSS27
rs149363012	12	561354	T	C	0.117577	0.0212118	2.97331e-08	PRSS27
rs79755767	12	54304624	A	G	0.0779359	0.0114773	1.11815e-11	PRSS27
rs66833807	12	89234726	A	C	-0.045004	0.00906698	6.92341e-07	PRSS27
rs113707571	12	123300979	C	A	0.0729059	0.0135044	6.71305e-08	PRSS27
rs188942006	15	64711627	C	G	0.0753795	0.0140632	8.32051e-08	PRSS27
rs56036921	16	2667078	A	C	-0.144984	0.0237665	1.05818e-09	PRSS27
rs148624502	16	2684792	A	G	0.289121	0.0317299	8.09096e-20	PRSS27
rs71386687	16	2717893	T	G	0.386516	0.0130422	5.16416e-193	PRSS27
rs2335544	16	2915294	C	A	0.0428332	0.00706213	1.31795e-09	PRSS27
rs77924615	16	20381010	A	G	-0.0486998	0.00869765	2.15353e-08	PRSS27
rs74035509	16	88500925	T	C	-0.0638522	0.0128649	6.93059e-07	PRSS27
rs671339	18	9618007	G	A	0.0382555	0.00772233	7.27512e-07	PRSS27
rs708686	19	5840608	T	C	0.160409	0.00833827	1.79102e-82	PRSS27
rs34262244	19	17795098	A	G	0.0425603	0.00824747	2.46405e-07	PRSS27
rs3730895	19	48153314	G	T	-0.0430633	0.00738625	5.53618e-09	PRSS27
rs1643490	19	48435689	C	T	0.105186	0.0142969	1.87715e-13	PRSS27
rs3843745	19	48596408	G	C	0.266278	0.00743315	1e-200	PRSS27
rs28400012	19	48748980	T	C	-0.250424	0.00911753	4.44631e-166	PRSS27
rs112955485	19	48770815	T	G	0.294571	0.0387092	2.7441e-14	PRSS27
rs78909033	2	240571486	A	G	-0.0537828	0.00991483	5.81219e-08	PRSS27
rs587935	21	39538813	T	C	0.0530645	0.00721524	1.91646e-13	PRSS27
rs7278220	21	41353453	A	G	0.0453011	0.00806453	1.93941e-08	PRSS27
rs150238576	22	25107994	G	C	-0.115888	0.0222573	1.92163e-07	PRSS27
rs1354034	3	56815721	C	T	-0.0492049	0.00691643	1.12564e-12	PRSS27
rs184190619	3	79548027	G	A	-0.150868	0.0302295	6.01506e-07	PRSS27
rs35225290	3	141411993	T	C	-0.0912296	0.00717209	4.57404e-37	PRSS27
rs541115	3	187920304	A	T	0.0523974	0.00716386	2.5906e-13	PRSS27
rs968042	4	105095560	A	G	0.0542036	0.00730413	1.16279e-13	PRSS27
rs6863594	5	172876100	G	T	0.0347163	0.00704285	8.25258e-07	PRSS27
rs9392349	6	1992651	G	A	-0.0501357	0.00708179	1.44644e-12	PRSS27
rs9501828	6	2339684	C	T	-0.157297	0.00686868	4.59198e-116	PRSS27
rs13193217	6	36751951	A	G	0.040827	0.00732149	2.45657e-08	PRSS27
rs11764390	7	80586889	A	G	0.0378141	0.00690228	4.28973e-08	PRSS27
rs6993770	8	105569300	T	A	0.047555	0.00750288	2.32423e-10	PRSS27
rs10758189	9	33125806	C	T	-0.0542717	0.00735327	1.57543e-13	PRSS27
rs10972823	9	36274868	G	A	-0.12325	0.00689628	1.9485e-71	PRSS27
rs4297160	9	97823224	A	G	0.0469834	0.00690927	1.04568e-11	PRSS27
rs17431934	9	97933494	C	T	0.0788162	0.00707969	8.69361e-29	PRSS27
rs635634	9	133279427	T	C	-0.0599918	0.00884317	1.16923e-11	PRSS27
rs7537101	1	15823889	C	T	0.0472382	0.00661958	9.59843e-13	PSAPL1
rs1062964	1	58576716	G	C	-0.125002	0.0144713	5.72269e-18	PSAPL1
rs585362	1	109247173	T	C	0.0567178	0.00914384	5.54524e-10	PSAPL1
rs56187823	1	109293601	A	G	0.076338	0.00725718	7.0648e-26	PSAPL1
rs652295	1	110304364	G	A	0.0491463	0.00742567	3.63078e-11	PSAPL1
rs77919400	1	151628347	G	A	0.132982	0.0209819	2.32836e-10	PSAPL1
rs61815559	1	152298743	T	A	0.365128	0.0187179	9.59401e-85	PSAPL1
rs115770375	1	152840427	G	C	-0.130335	0.0249558	1.76401e-07	PSAPL1
rs7531215	1	209416341	G	A	-0.0381375	0.00776769	9.11864e-07	PSAPL1
rs61836481	10	8319960	T	G	-0.0545169	0.0109138	5.87719e-07	PSAPL1
rs10761603	10	62058665	G	T	-0.0348504	0.00666763	1.72461e-07	PSAPL1
rs11817773	10	62833983	C	T	-0.0777101	0.0125607	6.14031e-10	PSAPL1
rs11835758	12	52651993	A	G	0.0752195	0.00676911	1.09471e-28	PSAPL1
rs2682314	12	52874432	A	G	-0.0454494	0.00698375	7.62255e-11	PSAPL1
rs59199058	12	92798348	T	A	0.0539402	0.00691714	6.28782e-15	PSAPL1
rs189275070	14	22915623	A	G	-0.22481	0.0353804	2.09657e-10	PSAPL1
rs145710177	14	34152294	T	C	-0.0795716	0.0161776	8.71505e-07	PSAPL1
rs1743379	14	69674253	T	C	-0.0686249	0.0106085	9.87416e-11	PSAPL1
rs17658212	15	40853721	T	C	-0.2805	0.0141709	3.34657e-87	PSAPL1
rs138156666	15	40878955	A	G	-0.255236	0.0385241	3.46418e-11	PSAPL1
rs72755040	15	64050558	A	G	-0.0749126	0.0146446	3.13148e-07	PSAPL1
rs28640218	16	20347945	T	G	-0.045478	0.00835388	5.21159e-08	PSAPL1
rs62031940	16	23238024	C	A	-0.0511559	0.00829606	6.99133e-10	PSAPL1
rs1549299	16	31142825	A	G	-0.0987158	0.00721131	1.18086e-42	PSAPL1
rs889591	16	58249237	G	C	0.050943	0.00744323	7.68953e-12	PSAPL1
rs11864904	16	69545883	C	T	-0.0654734	0.0119176	3.93324e-08	PSAPL1
rs8056763	16	79008835	T	G	-0.134317	0.0273843	9.34803e-07	PSAPL1
rs2469823	17	40850590	G	A	-0.0570754	0.00670414	1.6885e-17	PSAPL1
rs72833461	17	47860739	G	T	-0.0389067	0.00713545	4.96421e-08	PSAPL1
rs62085058	17	76491533	A	G	-0.0586008	0.00917459	1.68846e-10	PSAPL1
rs4078130	18	48138244	T	C	0.0862343	0.00658782	3.75837e-39	PSAPL1
rs72976190	18	79745057	G	T	0.0495089	0.00817201	1.37521e-09	PSAPL1
rs6508781	19	38294678	C	A	-0.195412	0.00881084	5.52077e-109	PSAPL1
rs6508786	19	38330642	A	G	-0.0678482	0.00870896	6.66807e-15	PSAPL1
rs12462756	19	49595166	A	G	0.0551852	0.00879575	3.51714e-10	PSAPL1
rs181163991	19	51005604	C	T	-0.229355	0.0278195	1.65997e-16	PSAPL1
rs62114506	2	242793	C	G	0.046799	0.00741659	2.78965e-10	PSAPL1
rs6757005	2	10770725	C	T	0.0502779	0.00657572	2.073e-14	PSAPL1
rs4296472	2	48519940	A	G	0.0355242	0.0071122	5.88871e-07	PSAPL1
rs7582445	2	60268739	C	A	0.0334593	0.00665394	4.94333e-07	PSAPL1
rs113710006	2	62318388	G	A	0.0490142	0.0090943	7.0635e-08	PSAPL1
rs72882586	2	155511184	G	A	0.0784202	0.0159724	9.12074e-07	PSAPL1
rs115528190	2	214965765	G	A	-0.0406084	0.00668113	1.21644e-09	PSAPL1
rs6128568	20	38624895	G	A	0.0398079	0.0070286	1.48143e-08	PSAPL1
rs11702562	21	41929953	C	T	0.0660716	0.0125079	1.27509e-07	PSAPL1
rs4320024	22	30313202	T	C	0.0542774	0.0105275	2.52592e-07	PSAPL1
rs13078237	3	134343520	C	T	0.0399329	0.00727666	4.06949e-08	PSAPL1
rs1436662	3	190304139	G	A	0.0932154	0.00668565	3.4898e-44	PSAPL1
rs12647103	4	7378993	C	T	0.126144	0.0161336	5.33581e-15	PSAPL1
rs79527344	4	7415696	G	A	0.411103	0.0202907	2.86088e-91	PSAPL1
rs74491793	4	7422781	C	T	-0.412298	0.00891045	1e-200	PSAPL1
rs36076856	4	7468605	C	T	0.193716	0.00747991	6.99842e-148	PSAPL1
rs10001673	4	7700684	G	A	0.0421559	0.0076788	4.02143e-08	PSAPL1
rs79286622	5	147972074	A	G	0.0843766	0.0162183	1.96562e-07	PSAPL1
rs9368728	6	11470810	A	G	0.0504059	0.00732782	6.03949e-12	PSAPL1
rs2256962	6	31097843	G	A	-0.0682881	0.0111398	8.78213e-10	PSAPL1
rs3132568	6	31134140	G	A	-0.0628272	0.00750824	5.87219e-17	PSAPL1
rs7835973	8	6865640	G	A	0.0708751	0.00900033	3.41507e-15	PSAPL1
rs11249885	8	8704498	T	C	0.0921269	0.00766861	3.01787e-33	PSAPL1
rs62495696	8	11850021	G	A	-0.0374824	0.00686026	4.66326e-08	PSAPL1
rs2011567	8	94959692	A	G	0.0500274	0.00653138	1.86595e-14	PSAPL1
rs980850	9	6269458	C	G	-0.0769198	0.0148053	2.04258e-07	PSAPL1
rs3758294	9	104902534	C	T	-0.0884915	0.00810138	8.94746e-28	PSAPL1
rs700088	9	123109259	C	T	-0.060314	0.00939123	1.34171e-10	PSAPL1
rs616154	9	133275050	T	C	0.0347898	0.00654257	1.05228e-07	PSAPL1
rs7080536	10	113588287	A	G	-0.193549	0.0186206	2.62966e-25	PTPN1
rs58512066	11	266315	C	T	0.0548496	0.00879535	4.48322e-10	PTPN1
rs10876550	12	54318524	A	G	0.0402747	0.0075466	9.46019e-08	PTPN1
rs10774624	12	111395984	A	G	-0.0412368	0.0075344	4.4214e-08	PTPN1
rs6572759	14	51444043	C	T	-0.0555836	0.011152	6.22315e-07	PTPN1
rs558737451	18	55889352	A	G	-0.167031	0.0333006	5.27983e-07	PTPN1
rs58768321	2	37763645	G	A	0.037729	0.0076028	6.95841e-07	PTPN1
rs112057098	20	23468264	T	C	0.110308	0.0219186	4.83816e-07	PTPN1
rs1354034	3	56815721	C	T	0.0839481	0.00763576	4.08037e-28	PTPN1
rs12187267	5	16490943	G	A	-0.0443904	0.0078835	1.79378e-08	PTPN1
rs10072098	5	33406004	C	T	-0.16915	0.0319928	1.24254e-07	PTPN1
rs274555	5	132387259	T	C	0.0412801	0.0077255	9.12431e-08	PTPN1
rs9402686	6	135106679	A	G	0.0420697	0.00844398	6.28623e-07	PTPN1
rs342293	7	106731773	G	C	-0.0516861	0.00749645	5.39635e-12	PTPN1
rs6993770	8	105569300	T	A	-0.0470609	0.00828496	1.34475e-08	PTPN1
rs409801	9	4744743	C	T	0.0385785	0.00748911	2.58714e-07	PTPN1
rs3917932	1	36478315	G	C	-0.0341002	0.00684795	6.37104e-07	PXN
rs17116524	12	54871843	G	A	-0.0733517	0.0132958	3.4504e-08	PXN
rs113004644	12	119934950	T	C	-0.347487	0.0107552	1e-200	PXN
rs74853376	12	119978658	A	C	0.183638	0.0191783	1.01601e-21	PXN
rs12422969	12	120218525	G	C	0.22805	0.0319632	9.69393e-13	PXN
rs2524393	12	120276946	G	A	0.548724	0.0137732	1e-200	PXN
rs206953	12	120380210	C	T	-0.163788	0.0102812	3.87525e-57	PXN
rs117692929	12	120446450	C	G	0.141018	0.0233745	1.60968e-09	PXN
rs11065302	12	120868584	T	C	-0.177504	0.0133487	2.39332e-40	PXN
rs4632248	19	53821741	T	G	0.0675172	0.00830166	4.1889e-16	PXN
rs145781149	2	133798937	T	G	-0.151767	0.0284682	9.76203e-08	PXN
rs1419664	6	31025536	T	C	-0.043196	0.00873169	7.53494e-07	PXN
rs3129754	6	32615269	G	A	0.0555852	0.00689292	7.37734e-16	PXN
rs10142551	14	105810587	A	G	0.0405557	0.00787229	2.58131e-07	RIPK4
rs3829431	14	105895949	A	G	0.115191	0.0109944	1.09901e-25	RIPK4
rs3184504	12	111446804	C	T	-0.054363	0.0076651	1.31917e-12	RRM2
rs59927312	17	13201185	T	C	-0.0824285	0.0161365	3.25215e-07	RRM2
rs113345881	19	44928379	G	A	0.0648768	0.0127245	3.422e-07	RRM2
rs7247412	19	51810615	C	T	-0.0671409	0.0087437	1.6062e-14	RRM2
rs6737932	2	10124166	C	T	-0.0509997	0.00882109	7.40065e-09	RRM2
rs12487125	3	77062618	C	T	-0.0904703	0.0172142	1.47564e-07	RRM2
rs35390427	4	130628624	T	G	0.102827	0.0206981	6.76722e-07	RRM2
rs17658600	9	3239491	G	A	-0.105554	0.0205299	2.72565e-07	RRM2
rs13283282	9	128703202	G	C	0.0582504	0.0109042	9.19136e-08	RRM2
rs111497099	1	86077759	A	G	-0.174521	0.0352022	7.13461e-07	S100A12
rs3014874	1	153365467	A	G	-0.236592	0.00836291	4.4978e-176	S100A12
rs61803119	1	153417726	T	G	0.155846	0.0119405	6.2044e-39	S100A12
rs187016536	14	57932777	A	G	0.176069	0.0354427	6.77454e-07	S100A12
rs11643915	16	19014889	C	A	0.0368438	0.00747585	8.29144e-07	S100A12
rs12450688	17	39987976	A	G	-0.061991	0.00734331	3.12392e-17	S100A12
rs34436714	19	53824059	A	C	0.168354	0.00905865	4.255e-77	S100A12
rs56009787	2	43118533	A	G	0.0511956	0.008651	3.26122e-09	S100A12
rs2305669	4	25914026	A	G	-0.03768	0.00739095	3.43036e-07	S100A12
rs11759553	6	135101158	T	A	-0.0414834	0.00825291	4.99482e-07	S100A12
rs56388170	7	28684757	T	G	0.053513	0.00819307	6.51178e-11	S100A12
rs3812260	7	44960381	C	T	0.0553733	0.0111397	6.66745e-07	S100A12
rs6984820	8	143919156	T	C	0.0513626	0.00743552	4.92493e-12	S100A12
rs10982156	9	114325784	A	T	0.137463	0.0150875	8.16206e-20	S100A12
rs12087678	1	40127176	G	A	-0.0514152	0.010214	4.80861e-07	SAP18
rs113420616	10	124605328	T	G	0.0452345	0.00889205	3.63639e-07	SAP18
rs889474	16	79470842	A	G	0.0464565	0.00805081	7.90788e-09	SAP18
rs75463474	2	44593178	C	A	-0.165286	0.0304394	5.6356e-08	SAP18
rs140764437	4	181234196	G	A	0.159864	0.0315881	4.17282e-07	SAP18
rs7917851	10	107481259	C	T	0.0554014	0.0108195	3.04726e-07	SATB1
rs10774624	12	111395984	A	G	-0.0429946	0.00761836	1.66583e-08	SATB1
rs439303	6	32241144	A	G	0.0451755	0.00848406	1.01093e-07	SATB1
rs117321075	9	102548482	G	A	-0.11198	0.022087	3.97979e-07	SATB1
rs1113734	1	29245540	C	T	0.0461587	0.00920481	5.31349e-07	SELP
rs6537748	1	112671759	G	T	-0.0367755	0.007506	9.60926e-07	SELP
rs9332575	1	169557863	C	T	-0.399941	0.0119429	1e-200	SELP
rs7523043	1	169560839	T	G	-0.134834	0.0156923	8.51922e-18	SELP
rs3917651	1	169630824	T	C	-0.115973	0.0168091	5.22276e-12	SELP
rs116417257	1	169634124	G	A	-0.165906	0.0295852	2.05003e-08	SELP
rs141465074	1	170159158	A	G	0.168774	0.033636	5.2301e-07	SELP
rs7529925	1	199038079	T	C	-0.0474456	0.00855537	2.92759e-08	SELP
rs115599319	1	211175861	C	T	-0.0881519	0.0172735	3.3378e-07	SELP
rs56043070	1	247556467	A	G	0.113719	0.0143295	2.08785e-15	SELP
rs2388594	10	3095253	A	G	-0.0373256	0.00748772	6.19926e-07	SELP
rs34640094	10	49082603	T	A	-0.0416924	0.00805415	2.26079e-07	SELP
rs7896518	10	63344740	G	A	0.0743514	0.00749484	3.39547e-23	SELP
rs11594179	10	102632823	T	C	0.0446421	0.0086652	2.57887e-07	SELP
rs10774624	12	111395984	A	G	-0.0452777	0.007363	7.78019e-10	SELP
rs2389224	13	95241349	C	A	0.0368096	0.0073867	6.25345e-07	SELP
rs832886	15	64863329	T	C	0.0510939	0.00993554	2.7105e-07	SELP
rs12445050	16	81837364	T	C	0.0990968	0.0105853	7.84152e-21	SELP
rs589559	18	9623054	A	G	0.0471955	0.00835656	1.62589e-08	SELP
rs892090	19	55027704	G	T	0.136428	0.00992095	4.98655e-43	SELP
rs13412535	2	224010157	A	G	-0.0444124	0.0087142	3.45892e-07	SELP
rs11694791	2	239541837	G	A	-0.0497865	0.00991306	5.10517e-07	SELP
rs6081569	20	19323142	C	G	0.0477496	0.00759768	3.28352e-10	SELP
rs7618405	3	18209017	A	C	-0.0477373	0.00910903	1.60011e-07	SELP
rs2278668	3	123116385	C	T	-0.0463589	0.00752546	7.26223e-10	SELP
rs4698839	4	101880784	T	C	-0.0476333	0.0074734	1.84514e-10	SELP
rs11242109	5	132341354	T	G	-0.0619459	0.00735526	3.70169e-17	SELP
rs35173808	6	31358371	A	C	-0.0731036	0.0124022	3.76036e-09	SELP
rs370102231	6	70633132	G	C	-0.0522861	0.00813406	1.29256e-10	SELP
rs62440278	6	144945485	G	A	0.169321	0.0342578	7.71045e-07	SELP
rs6961069	7	80589645	T	C	0.0556332	0.00748736	1.08368e-13	SELP
rs4921999	8	19156165	T	C	0.0419552	0.00793863	1.25745e-07	SELP
rs6993770	8	105569300	T	A	-0.115672	0.0081059	3.36124e-46	SELP
rs385893	9	4763176	C	T	0.0472365	0.00737267	1.48433e-10	SELP
rs2519093	9	133266456	T	C	-0.218687	0.00953607	2.19786e-116	SELP
rs58470381	13	44669439	T	G	-0.0876758	0.017779	8.16319e-07	SERPINB5
rs4048352	18	63489975	A	G	0.0538713	0.00799339	1.58928e-11	SERPINB5
rs12973772	19	31470228	G	C	0.0496035	0.00989138	5.30823e-07	SERPINB5
rs35503308	4	1782484	G	C	0.0386252	0.00776968	6.65135e-07	SERPINB5
rs1505389	4	164504318	G	T	-0.0398502	0.00807618	8.04452e-07	SERPINB5
rs3754275	1	84401808	T	G	-0.0966063	0.0197477	9.98068e-07	SERPINB9
rs7896518	10	63344740	G	A	0.0438315	0.0077204	1.36792e-08	SERPINB9
rs12880537	14	23353870	G	T	0.0394494	0.00758179	1.95907e-07	SERPINB9
rs892090	19	55027704	G	T	0.0625069	0.010182	8.30482e-10	SERPINB9
rs12187267	5	16490943	G	A	-0.0463261	0.00793857	5.36068e-09	SERPINB9
rs17622656	5	132485305	A	G	-0.0401196	0.00775317	2.28392e-07	SERPINB9
rs318431	6	2877446	C	T	0.0752885	0.00782112	6.19156e-22	SERPINB9
rs7751676	6	2931645	T	C	0.223258	0.0153904	1.10535e-47	SERPINB9
rs342293	7	106731773	G	C	-0.0406169	0.00754539	7.32504e-08	SERPINB9
rs6993770	8	105569300	T	A	-0.0702184	0.00833804	3.71792e-17	SERPINB9
rs9725331	1	232889921	C	A	0.0531934	0.0103279	2.5989e-07	SLC51B
rs72786554	10	19205731	C	G	-0.0507551	0.0102863	8.04674e-07	SLC51B
rs11239528	10	45459588	G	A	-0.0962996	0.00871874	2.3142e-28	SLC51B
rs2526680	11	61843744	T	C	-0.069748	0.0141261	7.91225e-07	SLC51B
rs10784889	12	71015481	T	C	0.0433097	0.00758198	1.11532e-08	SLC51B
rs17692830	12	115262321	T	C	0.0593396	0.0120831	9.06338e-07	SLC51B
rs56398830	13	103049340	A	G	-0.686945	0.035495	1.91337e-83	SLC51B
rs55971546	13	103065958	T	C	-0.246984	0.0181345	3.06408e-42	SLC51B
rs3747577	16	4365695	G	C	-0.0434078	0.00857669	4.16764e-07	SLC51B
rs3813582	16	79715456	C	T	0.0551635	0.00802466	6.23161e-12	SLC51B
rs12938714	17	30318092	A	G	0.144349	0.00793763	6.73597e-74	SLC51B
rs11078916	17	39590054	C	T	-0.0720588	0.00839054	8.84301e-18	SLC51B
rs12970369	18	57847718	G	A	-0.0406516	0.00755091	7.2981e-08	SLC51B
rs296361	19	47886106	A	G	0.0879024	0.0101765	5.72928e-18	SLC51B
rs681343	19	48703205	T	C	-0.219579	0.00757019	5.55904e-185	SLC51B
rs4414734	2	132420408	A	T	-0.107832	0.0078987	1.96789e-42	SLC51B
rs12623537	2	182001942	T	C	0.039849	0.0077275	2.51235e-07	SLC51B
rs11690474	2	232720609	T	G	-0.0760107	0.00775982	1.17815e-22	SLC51B
rs852033	20	17104848	C	A	0.0446696	0.00862292	2.21493e-07	SLC51B
rs13065564	3	70915893	G	T	-0.0409697	0.00811651	4.47167e-07	SLC51B
rs7627663	3	152175991	T	A	0.0559168	0.00904659	6.37045e-10	SLC51B
rs355747	3	154245184	C	T	-0.0525517	0.0103889	4.22717e-07	SLC51B
rs939885	3	196228891	A	G	-0.167536	0.00749967	1.53815e-110	SLC51B
rs10066308	5	132454924	A	G	-0.0415459	0.00809949	2.90596e-07	SLC51B
rs76154200	6	150698486	G	A	0.0715978	0.0126966	1.70903e-08	SLC51B
rs145944172	9	68434171	A	G	-0.138394	0.0253594	4.83459e-08	SLC51B
rs2519093	9	133266456	T	C	-0.0665727	0.00964359	5.08042e-12	SLC51B
rs1185160	4	20198728	T	G	-0.0613791	0.00842192	3.14557e-13	SLIT2
rs28366133	6	31396299	T	C	0.0478587	0.00807081	3.03208e-09	SLIT2
rs3018451	8	102569405	C	G	-0.0477894	0.00855112	2.28818e-08	SLIT2
rs11581018	1	110940729	T	C	-0.0487164	0.00830871	4.53774e-09	SLITRK2
rs4074425	1	214524362	A	G	0.0764345	0.0142977	8.99498e-08	SLITRK2
rs61830291	1	220827800	C	A	-0.0882966	0.0123687	9.4189e-13	SLITRK2
rs56278466	10	17833858	G	T	0.0729797	0.00768796	2.25061e-21	SLITRK2
rs10823396	10	69483567	G	C	0.0514921	0.0073333	2.1918e-12	SLITRK2
rs17748235	10	122565884	T	C	0.0965799	0.0187798	2.70751e-07	SLITRK2
rs12805381	11	11254541	T	G	0.0830452	0.00739783	3.05211e-29	SLITRK2
rs74693143	11	11343588	G	T	0.0670353	0.0130908	3.0425e-07	SLITRK2
rs55732106	11	11619377	C	T	0.0718096	0.00999871	6.87543e-13	SLITRK2
rs112490887	11	65731401	T	C	-0.0649794	0.0125888	2.44754e-07	SLITRK2
rs74612335	11	126368738	C	T	-0.0624445	0.0107834	7.00438e-09	SLITRK2
rs4369416	11	128456568	T	C	-0.0421364	0.00802032	1.4907e-07	SLITRK2
rs7954567	12	6381959	A	G	0.0421388	0.0077158	4.72476e-08	SLITRK2
rs11105298	12	89482366	C	T	-0.0906009	0.00854819	3.01648e-26	SLITRK2
rs653178	12	111569952	T	C	-0.0454183	0.00725804	3.90814e-10	SLITRK2
rs9923395	16	4377782	C	A	0.0432217	0.00875993	8.05527e-07	SLITRK2
rs2241918	17	76567571	G	A	-0.0485303	0.00913192	1.07031e-07	SLITRK2
rs7603493	2	42702037	C	T	0.0380348	0.00735814	2.3525e-07	SLITRK2
rs1047891	2	210675783	A	C	0.0399592	0.00788715	4.0549e-07	SLITRK2
rs6088721	20	35118208	C	A	-0.0368525	0.00744117	7.32622e-07	SLITRK2
rs3859579	20	63670442	G	A	-0.0443077	0.00772704	9.80302e-09	SLITRK2
rs7277800	21	34283434	A	G	-0.045728	0.0082106	2.55635e-08	SLITRK2
rs13098031	3	12198431	T	G	0.0439089	0.00821125	8.92237e-08	SLITRK2
rs62262391	3	123386272	T	C	0.0742914	0.00871584	1.5449e-17	SLITRK2
rs68119427	4	56891864	G	C	0.0522438	0.00769327	1.11481e-11	SLITRK2
rs13107325	4	102267552	T	C	0.263083	0.0139549	2.80802e-79	SLITRK2
rs62377439	5	109462433	A	G	0.069148	0.0110721	4.23165e-10	SLITRK2
rs78334147	5	109681535	T	C	0.104517	0.0120916	5.44001e-18	SLITRK2
rs790155	5	128162688	T	C	0.0468366	0.00855709	4.41428e-08	SLITRK2
rs201616219	7	17930074	C	A	0.0394749	0.00755092	1.7151e-07	SLITRK2
rs73234874	7	127651967	A	G	0.0396078	0.00806121	8.95159e-07	SLITRK2
rs3731211	9	21986848	A	T	-0.0669117	0.00815334	2.27457e-16	SLITRK2
rs10757287	9	22143571	T	A	0.0517126	0.00993371	1.93197e-07	SLITRK2
rs1131773	9	93077974	G	A	0.0705283	0.0103273	8.53297e-12	SLITRK2
rs13295248	9	136492188	C	T	0.0405902	0.00819321	7.26558e-07	SLITRK2
rs78833150	1	114810855	A	G	-0.224791	0.0446337	4.74471e-07	SMTN
rs12292693	11	65169248	C	A	-0.0747068	0.00843972	8.61192e-19	SMTN
rs4906234	14	102610591	C	G	0.039435	0.00804335	9.44735e-07	SMTN
rs6035269	20	19282333	C	T	0.0381861	0.00761325	5.28287e-07	SMTN
rs34841406	21	34996068	A	T	-0.0595107	0.0116663	3.37723e-07	SMTN
rs7287178	22	31043611	T	C	-0.040589	0.00821026	7.66567e-07	SMTN
rs13084580	3	39146691	T	C	-0.0593215	0.0115634	2.89554e-07	SMTN
rs1354034	3	56815721	C	T	0.0716845	0.00746804	8.08537e-22	SMTN
rs114694170	5	88884379	C	T	0.150547	0.0156146	5.34441e-22	SMTN
rs274555	5	132387259	T	C	0.0394329	0.00756184	1.8409e-07	SMTN
rs342293	7	106731773	G	C	-0.0502353	0.00733841	7.61904e-12	SMTN
rs74446141	1	223128270	T	C	0.139702	0.0272577	2.97146e-07	SNAPIN
rs35662118	10	100293127	T	C	-0.0819819	0.0157771	2.03348e-07	SNAPIN
rs10838171	11	43795812	G	A	-0.0407191	0.00822066	7.29794e-07	SNAPIN
rs11834080	12	12464433	G	A	-0.0458463	0.00826716	2.92954e-08	SNAPIN
rs1260326	2	27508073	C	T	-0.0394798	0.00763181	2.30293e-07	SNAPIN
rs55680132	2	196434220	A	G	0.0505772	0.0102927	8.92771e-07	SNAPIN
rs1354034	3	56815721	C	T	0.0473928	0.00758684	4.1917e-10	SNAPIN
rs12187267	5	16490943	G	A	-0.0384799	0.00783979	9.18756e-07	SNAPIN
rs274555	5	132387259	T	C	0.0440075	0.00767557	9.84102e-09	SNAPIN
rs7741969	6	32587745	G	T	0.105411	0.0194349	5.83499e-08	SNAPIN
rs342293	7	106731773	G	C	-0.0392958	0.00744926	1.32666e-07	SNAPIN
rs79520909	9	23394165	A	G	0.158399	0.0304297	1.9358e-07	SNAPIN
rs200436	1	6615429	G	A	-0.0575077	0.0116177	7.42113e-07	SOD3
rs333947	1	109928142	A	G	-0.0612632	0.00938622	6.71274e-11	SOD3
rs56278466	10	17833858	G	T	0.0605924	0.00704435	7.86502e-18	SOD3
rs10740131	10	63511728	T	A	0.0389389	0.00670152	6.23003e-09	SOD3
rs10500715	11	9951515	G	T	-0.0393287	0.00671131	4.62679e-09	SOD3
rs597808	12	111535554	G	A	0.0540653	0.0066851	6.09397e-16	SOD3
rs139097404	15	43641743	C	T	-0.112151	0.0227999	8.70122e-07	SOD3
rs184458383	16	75215654	T	C	-0.126396	0.0126846	2.17972e-23	SOD3
rs4782379	16	88605609	C	A	-0.0347424	0.00677711	2.95277e-07	SOD3
rs3826331	17	39994239	C	T	0.0343747	0.00681224	4.51118e-07	SOD3
rs144579769	17	66247762	T	C	-0.089877	0.0149449	1.81105e-09	SOD3
rs77542162	17	69085137	G	A	0.167299	0.0224301	8.73776e-14	SOD3
rs1260326	2	27508073	C	T	0.0422145	0.00685474	7.34632e-10	SOD3
rs62276832	3	99134738	G	C	0.114149	0.0228737	6.0249e-07	SOD3
rs56074735	3	186969107	G	A	-0.0511082	0.0102747	6.55179e-07	SOD3
rs2631769	4	8465139	A	G	-0.0530038	0.00698542	3.25462e-14	SOD3
rs3796735	4	8597705	T	C	-0.114037	0.00735919	3.69999e-54	SOD3
rs7684977	4	24759569	A	G	0.265639	0.00833589	1e-200	SOD3
rs2123743	4	24948404	T	C	0.141988	0.0109795	2.96825e-38	SOD3
rs62409675	4	25027470	G	A	-0.046387	0.0076037	1.05682e-09	SOD3
rs13107325	4	102267552	T	C	0.159218	0.0132023	1.72028e-33	SOD3
rs76142317	5	39440164	A	C	0.0917229	0.0178786	2.89241e-07	SOD3
rs6906175	6	31403324	C	G	0.0523808	0.00802979	6.87702e-11	SOD3
rs6913090	6	80766448	C	T	-0.0414093	0.00668937	6.00427e-10	SOD3
rs2691623	7	17853953	G	A	-0.0444977	0.00668638	2.83335e-11	SOD3
rs41341748	8	16155085	A	G	0.210404	0.0319956	4.8317e-11	SOD3
rs657152	9	133263862	A	C	0.0343954	0.00703047	9.96529e-07	SOD3
rs80293268	1	8147519	C	G	-0.110587	0.0171556	1.1476e-10	SPINK5
rs113630186	1	151953725	A	G	-0.0691822	0.0126272	4.28203e-08	SPINK5
rs11589479	1	155060832	A	G	0.053314	0.0095222	2.1569e-08	SPINK5
rs12121919	1	179371350	C	T	-0.0364455	0.0070243	2.12007e-07	SPINK5
rs11220477	11	126405507	T	C	-0.132744	0.0174545	2.84577e-14	SPINK5
rs3184504	12	111446804	C	T	0.0348235	0.00695704	5.57186e-07	SPINK5
rs57375815	13	26486272	C	T	-0.0398638	0.00784623	3.76184e-07	SPINK5
rs11639111	15	49457538	T	C	-0.0381881	0.00714796	9.16664e-08	SPINK5
rs34560261	15	90191194	T	C	-0.0599569	0.00947035	2.43568e-10	SPINK5
rs7193058	16	20348779	A	G	0.0529874	0.00820342	1.05264e-10	SPINK5
rs55714927	17	7176997	T	C	0.10018	0.00885853	1.18631e-29	SPINK5
rs681343	19	48703205	T	C	0.19806	0.00709205	1.25603e-171	SPINK5
rs1260326	2	27508073	C	T	0.0632057	0.00716215	1.09496e-18	SPINK5
rs955658	2	60274286	C	T	0.0500082	0.00711374	2.06824e-12	SPINK5
rs121908120	2	218890289	A	T	-0.13923	0.0216751	1.33162e-10	SPINK5
rs10023574	4	106860695	A	C	0.0380649	0.00747929	3.59244e-07	SPINK5
rs3846235	4	143306688	T	C	-0.0377105	0.00712127	1.18708e-07	SPINK5
rs76031156	5	147803192	C	G	0.0796859	0.0158326	4.82792e-07	SPINK5
rs141717117	5	147970577	T	C	-0.220159	0.0180738	3.91742e-34	SPINK5
rs67918261	5	148061444	T	C	-0.536813	0.0160469	1e-200	SPINK5
rs62387549	5	148142991	C	G	-0.234244	0.00739314	1e-200	SPINK5
rs10058828	5	148476229	T	C	0.0834517	0.0170084	9.27193e-07	SPINK5
rs2479016	6	2245111	G	A	-0.0459571	0.00714027	1.224e-10	SPINK5
rs6932503	6	109286755	A	G	0.0354787	0.00705452	4.92516e-07	SPINK5
rs11781511	8	9334913	G	A	-0.0678375	0.010963	6.09762e-10	SPINK5
rs587600964	9	133296749	G	C	-0.0935604	0.0109	9.20026e-18	SPINK5
rs186674732	14	105962777	A	G	-0.162861	0.0233716	3.20701e-12	THAP12
rs3849552	3	21839949	C	A	0.045391	0.00902241	4.88135e-07	THAP12
rs116371021	5	2448316	C	T	-0.109102	0.0219173	6.42791e-07	THAP12
rs12045335	1	197331865	C	A	-0.0395515	0.00740522	9.24209e-08	TNIP1
rs4759076	12	54336088	C	T	0.0653955	0.00743962	1.49348e-18	TNIP1
rs55856289	2	239015439	T	C	-0.0509547	0.010383	9.22338e-07	TNIP1
rs79634658	20	56791772	T	C	-0.165549	0.0307274	7.1374e-08	TNIP1
rs1354034	3	56815721	C	T	0.0742684	0.0074932	3.71279e-23	TNIP1
rs4916524	3	196595488	T	C	-0.0437294	0.00876687	6.1e-07	TNIP1
rs1585213	4	102523541	T	C	0.050559	0.00747519	1.34648e-11	TNIP1
rs114694170	5	88884379	C	T	0.0822806	0.0156449	1.44627e-07	TNIP1
rs274555	5	132387259	T	C	0.0413783	0.00757606	4.7152e-08	TNIP1
rs342293	7	106731773	G	C	-0.0526508	0.00735296	8.03896e-13	TNIP1
rs409801	9	4744743	C	T	0.040116	0.00734626	4.74176e-08	TNIP1
rs6686818	1	151235239	T	C	0.033696	0.00687538	9.53652e-07	TNXB
rs61819142	1	214236419	A	G	-0.0345188	0.00695753	7.00003e-07	TNXB
rs7539020	1	230713444	T	C	-0.0362487	0.00710465	3.35885e-07	TNXB
rs56278466	10	17833858	G	T	0.0515458	0.00718371	7.21107e-13	TNXB
rs685903	11	126317942	C	T	0.0680004	0.00686143	3.74628e-23	TNXB
rs78689694	11	126364925	C	G	-0.150481	0.0101082	3.99485e-50	TNXB
rs2013002	12	111762346	C	T	0.0351279	0.00691126	3.72083e-07	TNXB
rs12442366	15	101233358	A	G	0.0436042	0.0070598	6.55783e-10	TNXB
rs55714927	17	7176997	T	C	0.0955504	0.00862138	1.51775e-28	TNXB
rs78173576	17	7313780	G	T	0.0907897	0.0181116	5.36451e-07	TNXB
rs77542162	17	69085137	G	A	0.145838	0.0227988	1.58745e-10	TNXB
rs2040295	18	59568380	A	G	-0.0358523	0.00712119	4.78862e-07	TNXB
rs10419703	19	35071841	C	T	-0.067861	0.0137752	8.37954e-07	TNXB
rs12480667	20	46354878	A	G	0.0444166	0.00782378	1.36981e-08	TNXB
rs162489	21	26939184	C	A	0.0712294	0.0136965	1.98678e-07	TNXB
rs1236213	21	27105423	T	G	-0.0499604	0.00697662	8.00203e-13	TNXB
rs13162741	5	39576462	C	T	-0.0406971	0.00781667	1.92482e-07	TNXB
rs111756197	6	30193997	G	A	-0.427669	0.0722315	3.20347e-09	TNXB
rs9262222	6	30839958	G	T	1.0739	0.0331857	1e-200	TNXB
rs9468873	6	31134103	C	T	0.19031	0.0103393	1.16466e-75	TNXB
rs45451301	6	31967615	C	T	-0.702346	0.0225758	1e-200	TNXB
rs114879139	6	31969985	C	G	0.184772	0.0307841	1.94666e-09	TNXB
rs1063379	6	32978257	C	T	0.183345	0.0286586	1.57881e-10	TNXB
rs6601299	8	9327181	C	T	-0.0670496	0.0112446	2.47919e-09	TNXB
rs2685419	8	27948890	A	G	0.0401335	0.00738925	5.5932e-08	TNXB
rs7019909	9	33113324	T	C	0.0580749	0.0112407	2.3855e-07	TNXB
rs1137654	9	98808054	T	A	0.063161	0.0121452	1.98783e-07	TNXB
rs10982156	9	114325784	A	T	-0.0831722	0.0140388	3.13372e-09	TNXB
rs6580981	12	54329244	A	G	0.0498441	0.00728896	8.01309e-12	TPMT
rs1531031	12	54891817	C	T	-0.0374793	0.00757079	7.40185e-07	TPMT
rs7187181	16	82240660	T	C	-0.0704357	0.0140553	5.40568e-07	TPMT
rs6036852	20	2533484	A	G	0.0519624	0.0104801	7.11492e-07	TPMT
rs117606872	20	49347034	G	A	0.141031	0.0276085	3.25155e-07	TPMT
rs1354034	3	56815721	C	T	0.0441194	0.0073425	1.8693e-09	TPMT
rs11934907	4	168044582	T	G	0.0384678	0.00751819	3.11028e-07	TPMT
rs11950562	5	132316836	C	A	-0.0443347	0.00723876	9.0895e-10	TPMT
rs9371010	6	17727712	G	A	0.0653466	0.0105027	4.91168e-10	TPMT
rs183988068	6	17814141	C	T	-0.786854	0.0217111	1e-200	TPMT
rs9383374	6	18354131	A	C	0.0761447	0.00791154	6.30086e-22	TPMT
rs9477755	6	18484610	G	C	-0.327315	0.0208037	8.91661e-56	TPMT
rs6931466	6	19100276	G	A	-0.0697517	0.00884583	3.13906e-15	TPMT
rs6993770	8	105569300	T	A	-0.0399072	0.00797428	5.60119e-07	TPMT
rs141439261	14	45041391	G	A	-0.136447	0.0275803	7.5261e-07	TRIM25
rs2525992	17	56910821	T	C	-0.0997392	0.00834171	5.98963e-33	TRIM25
rs3786448	18	3745759	G	A	0.0411756	0.00811162	3.85203e-07	TRIM25
rs115484459	2	195916010	A	G	-0.149066	0.0281693	1.21124e-07	TRIM25
rs1354034	3	56815721	C	T	0.0417796	0.00753042	2.88762e-08	TRIM25
rs144313884	3	118045827	A	G	-0.144192	0.0280445	2.72458e-07	TRIM25
rs17622656	5	132485305	A	G	-0.0406309	0.00759597	8.84362e-08	TRIM25
rs2963189	5	162279660	A	C	0.044404	0.00906602	9.68902e-07	TRIM25
rs16873415	8	105579574	G	A	-0.0375181	0.0075316	6.31175e-07	TRIM25
rs4777183	15	69712436	T	C	0.0391873	0.00771358	3.76825e-07	TXNL1
rs11645824	16	12630564	A	T	-0.0768684	0.0155871	8.15849e-07	TXNL1
rs6857	19	44888997	T	C	0.0512192	0.0102598	5.96953e-07	TXNL1
rs12473891	2	67974266	A	G	0.059615	0.0103376	8.07793e-09	TXNL1
rs6473227	8	80373657	A	C	0.0459127	0.00798419	8.90082e-09	TXNL1
rs11002342	10	77942472	T	C	0.0400467	0.00768028	1.84591e-07	VAMP5
rs11643127	16	57885130	T	C	0.0413258	0.0081907	4.52439e-07	VAMP5
rs4503880	18	58416822	C	T	-0.0506287	0.00956013	1.18484e-07	VAMP5
rs7257109	19	39172267	A	G	-0.0379828	0.00761485	6.10113e-07	VAMP5
rs6547623	2	85574841	A	T	0.0837949	0.0083467	1.02424e-23	VAMP5
rs844906	20	23151420	T	C	0.039463	0.00777413	3.8507e-07	VAMP5
rs4835265	4	145900258	A	C	0.0623832	0.0105131	2.95883e-09	VAMP5
rs6883713	5	107543449	C	G	-0.06151	0.0112138	4.13019e-08	VAMP5
rs505922	9	133273813	C	T	0.0623127	0.00820135	3.01093e-14	VAMP5
rs10157710	1	47496019	T	C	0.0454629	0.00904008	4.92935e-07	VASN
rs629301	1	109275684	T	G	-0.054482	0.00857743	2.12824e-10	VASN
rs150816167	1	179602727	C	T	0.12868	0.0180282	9.48855e-13	VASN
rs7896518	10	63344740	G	A	0.0532451	0.00730354	3.09243e-13	VASN
rs9633740	10	80505515	G	A	0.0524209	0.00882418	2.83981e-09	VASN
rs10838058	11	5412121	G	A	0.0357568	0.00711832	5.08136e-07	VASN
rs174560	11	61814292	C	T	0.038557	0.00767043	4.98976e-07	VASN
rs11045856	12	21197755	G	T	0.0524772	0.0083824	3.8399e-10	VASN
rs7310615	12	111427245	G	C	0.0364425	0.0071586	3.56689e-07	VASN
rs117281247	14	31875236	T	G	-0.132517	0.0268003	7.62939e-07	VASN
rs339969	15	60591082	A	C	0.040606	0.00734236	3.19544e-08	VASN
rs10851885	15	76012162	G	A	0.0431142	0.00825754	1.77779e-07	VASN
rs78599112	15	86183793	G	A	-0.137307	0.027661	6.90892e-07	VASN
rs11856403	15	101240920	C	A	0.053038	0.0091705	7.31392e-09	VASN
rs118111189	16	4327083	C	G	-0.866094	0.01698	1e-200	VASN
rs183717655	16	4547672	C	G	0.177029	0.010161	5.58985e-68	VASN
rs77116097	16	4626488	T	C	0.107837	0.0127074	2.13649e-17	VASN
rs13333045	16	4941389	G	C	-0.0485346	0.00797685	1.16907e-09	VASN
rs11648003	16	72018449	G	A	0.045346	0.0092122	8.54949e-07	VASN
rs34931250	17	68883786	T	C	-0.0879646	0.0150305	4.84485e-09	VASN
rs77542162	17	69085137	G	A	0.18749	0.0239657	5.14754e-15	VASN
rs1672981	19	35056147	C	T	-0.0795838	0.014442	3.57627e-08	VASN
rs3814995	19	35851310	T	C	0.043211	0.00767877	1.83012e-08	VASN
rs2081194	19	48760220	C	G	0.0405209	0.007494	6.40472e-08	VASN
rs1132990	19	49524906	G	A	0.0510862	0.00926839	3.55026e-08	VASN
rs1260326	2	27508073	C	T	0.0641323	0.0073318	2.18827e-18	VASN
rs2241883	2	88124547	C	T	-0.0393516	0.00774967	3.8176e-07	VASN
rs17208178	22	18980069	C	G	0.08416	0.0164839	3.29762e-07	VASN
rs73079428	3	55586433	T	C	-0.0423567	0.00848775	6.0274e-07	VASN
rs12497521	3	72439389	C	G	0.0380091	0.00773035	8.79427e-07	VASN
rs4431046	3	136130281	C	A	0.0427533	0.00853054	5.39237e-07	VASN
rs788862	4	81215346	C	G	0.0400511	0.0079143	4.17955e-07	VASN
rs13107325	4	102267552	T	C	0.0667261	0.0136127	9.49883e-07	VASN
rs1611548	6	29894311	G	A	0.0472207	0.00904073	1.7595e-07	VASN
rs372313241	6	31955454	A	T	-0.104236	0.0203616	3.06754e-07	VASN
rs12190755	6	43354493	G	A	-0.0488827	0.00931952	1.56113e-07	VASN
rs17145750	7	73612048	T	C	0.0529442	0.00977152	6.01977e-08	VASN
rs6973520	7	129100389	T	C	0.0394682	0.00716416	3.60628e-08	VASN
rs4841132	8	9326086	G	A	-0.0970576	0.0124078	5.18681e-15	VASN
rs11634252	15	101452832	G	A	-0.0456447	0.00822834	2.90182e-08	WFDC1
rs400345	16	84294888	T	C	-0.356505	0.00994569	1e-200	WFDC1
rs244783	16	84326449	T	G	-0.0556945	0.00979323	1.29262e-08	WFDC1
rs1654425	19	55027612	C	T	0.0643939	0.0101826	2.54988e-10	WFDC1
rs68066031	2	224015781	C	T	-0.201682	0.0090383	2.69153e-110	WFDC1
rs11903394	2	240622877	A	G	0.148939	0.0297663	5.62717e-07	WFDC1
rs9266715	6	31381943	T	C	-0.0489368	0.00814805	1.90213e-09	WFDC1
rs118019468	8	19768513	A	C	0.109008	0.0201856	6.65227e-08	WFDC1
rs10978838	9	107408521	T	C	0.154176	0.0309518	6.32048e-07	WFDC1
rs12026735	1	30776072	A	G	-0.0511204	0.0097294	1.48652e-07	ZNF830
rs35871881	11	123485743	G	A	0.0503912	0.00905123	2.5866e-08	ZNF830
rs72660424	14	29842440	T	C	-0.055435	0.00962366	8.3975e-09	ZNF830
rs80095680	16	30891032	G	A	0.047573	0.0086028	3.20324e-08	ZNF830
rs9907708	17	16989369	T	A	-0.0425547	0.0079729	9.42801e-08	ZNF830
rs56119132	2	105794330	A	G	-0.0492606	0.00942614	1.73253e-07	ZNF830
rs617119	3	32414275	T	C	0.0596349	0.00754638	2.73464e-15	ZNF830
rs7690845	4	182349486	C	A	0.0496421	0.00978947	3.95795e-07	ZNF830
rs3873387	6	31307886	A	C	0.0517861	0.0093685	3.24474e-08	ZNF830
rs3018449	8	102567381	C	T	-0.0602621	0.00857376	2.08497e-12	ZNF830
